# Supplementary material for: Iodine-catalyzed formation of substituted 2-aminobenzothiazole derivatives in PEG400
Source: Royal Society of Chemistry journal article supplement (doi:10.1039/c6ra15971k), 2016-01-01

## Supporting Information

### Iodine-catalyzed formation of substituted 2-aminobenzothiazole derivatives in PEG<sub>400</sub>

G. Dumonteil,<sup>a</sup> M.-A. Hiebel,<sup>a</sup> M.-C. Scherrmann,<sup>b</sup> and S. Berteina-Raboin<sup>a\*</sup>

E-mail: sabine.berteina-raboin@univ-orleans.fr

#### Table of contents

|                                                                            |    |
|----------------------------------------------------------------------------|----|
| <i>N</i> -tert-butyl-1,3-benzothiazol-2-amine (3a).....                    | 2  |
| <i>N</i> -tert-butyl-5-chloro-1,3-benzothiazol-2-amine (3b) .....          | 4  |
| <i>N</i> -(2,4,4-trimethylpentan-2-yl)-1,3-benzothiazol-2-amine (3c) ..... | 6  |
| <i>N</i> -cyclohexyl-1,3-benzothiazol-2-amine (3d) .....                   | 8  |
| <i>N</i> -butyl-1,3-benzothiazol-2-amine (3e).....                         | 10 |
| <i>N</i> -benzyl-1,3-benzothiazol-2-amine (3f) .....                       | 12 |
| <i>N</i> -phenyl-1,3-benzothiazol-2-amine (3g) .....                       | 14 |
| <i>N</i> -(4-methoxyphenyl)-1,3-benzothiazol-2-amine (3h) .....            | 16 |
| <i>N</i> -(4-bromophenyl)-1,3-benzothiazol-2-amine (3i).....               | 18 |
| Methyl 4-[(1,3-benzothiazol-2-yl)amino]benzoate (3j).....                  | 20 |
| 1-(4-((1,3-benzothiazol-2-yl)amino)phenyl)-ethan-1-one (3k)                | 22 |
| <i>N</i> -(2-methylphenyl)-1,3-benzothiazol-2-amine (3l) .....             | 24 |
| <i>N</i> -(2-methyl-5-nitrophenyl)-1,3-benzothiazol-2-amine (3m)           | 26 |

# N-tert-butyl-1,3-benzothiazol-2-amine (3a)

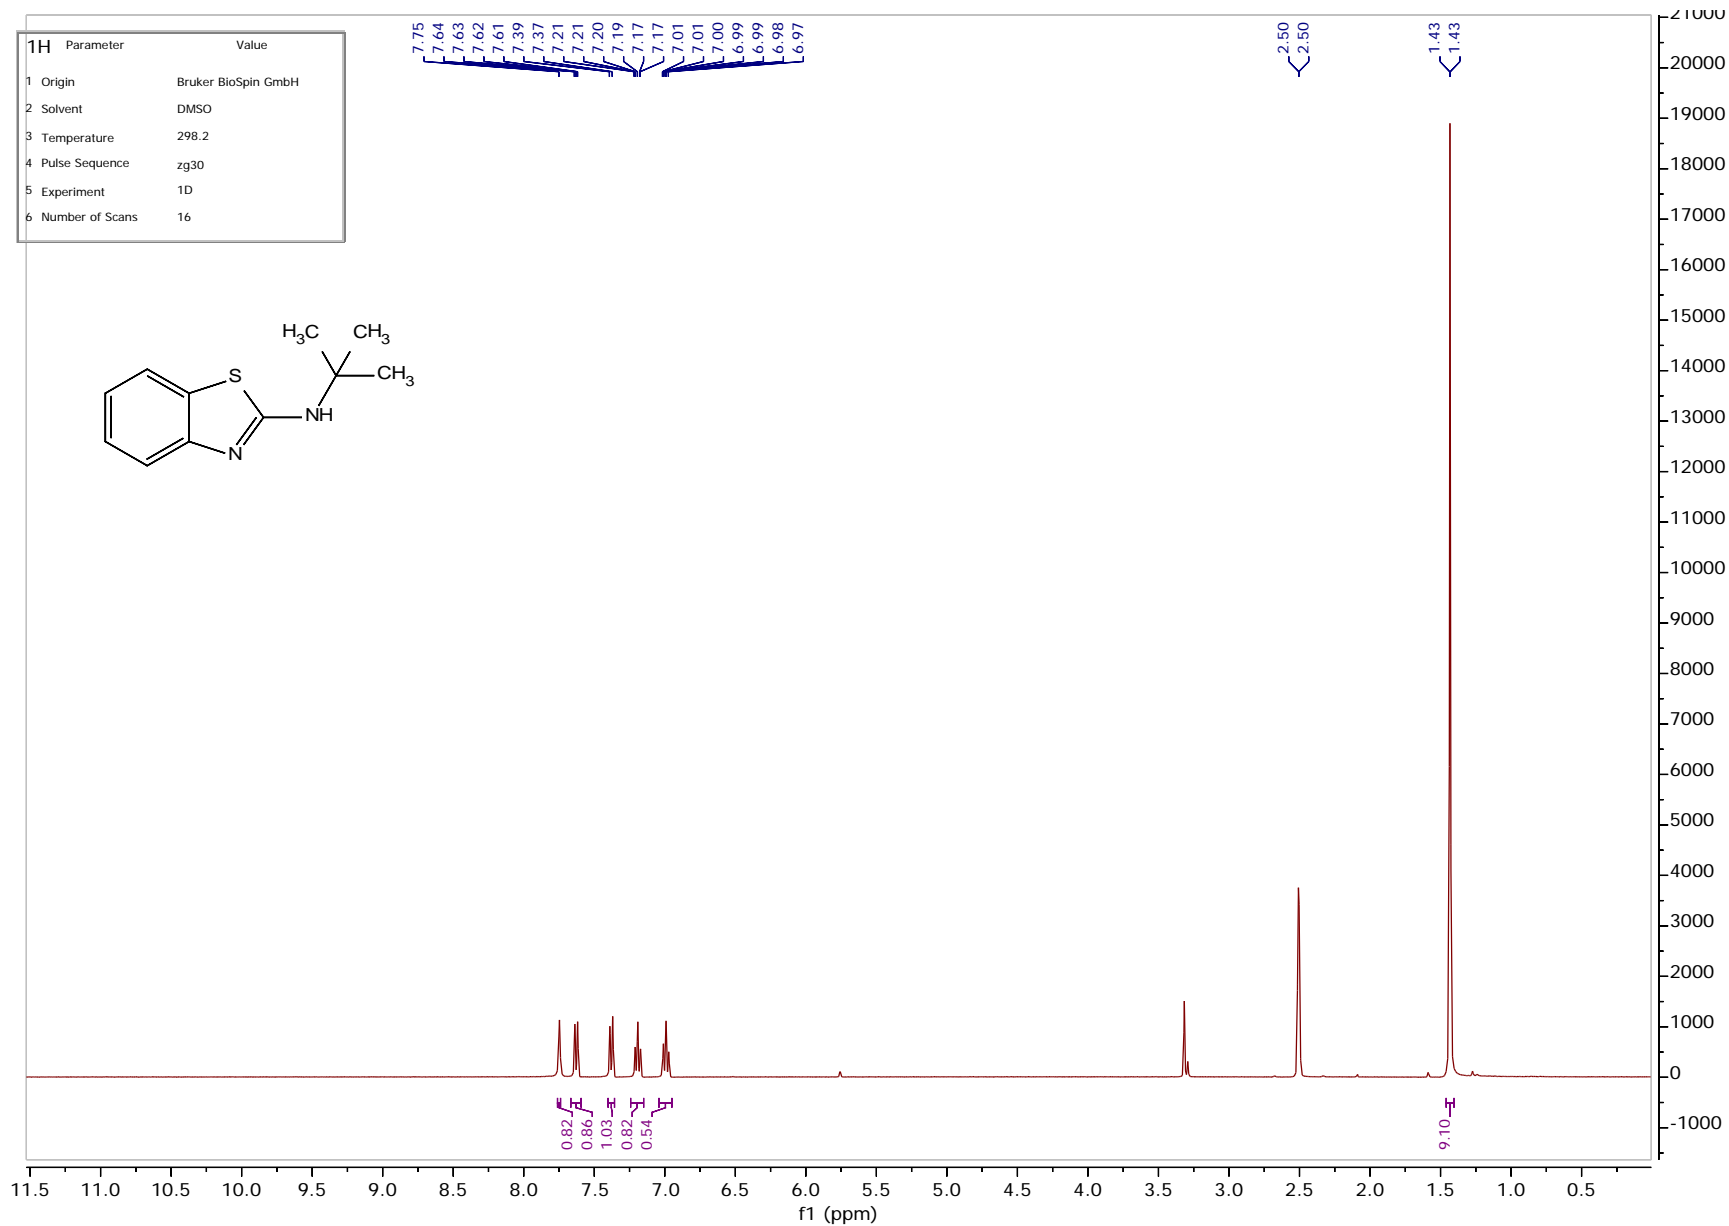

| <sup>13</sup> C | Parameter       | Value               |
|-----------------|-----------------|---------------------|
| 1               | Origin          | Bruker BioSpin GmbH |
| 2               | Solvent         | DMSO                |
| 3               | Temperature     | 298.1               |
| 4               | Pulse Sequence  | zgpg30              |
| 5               | Experiment      | 1D                  |
| 6               | Number of Scans | 1024                |

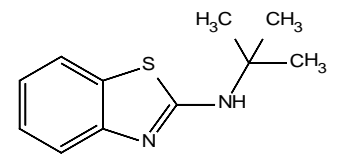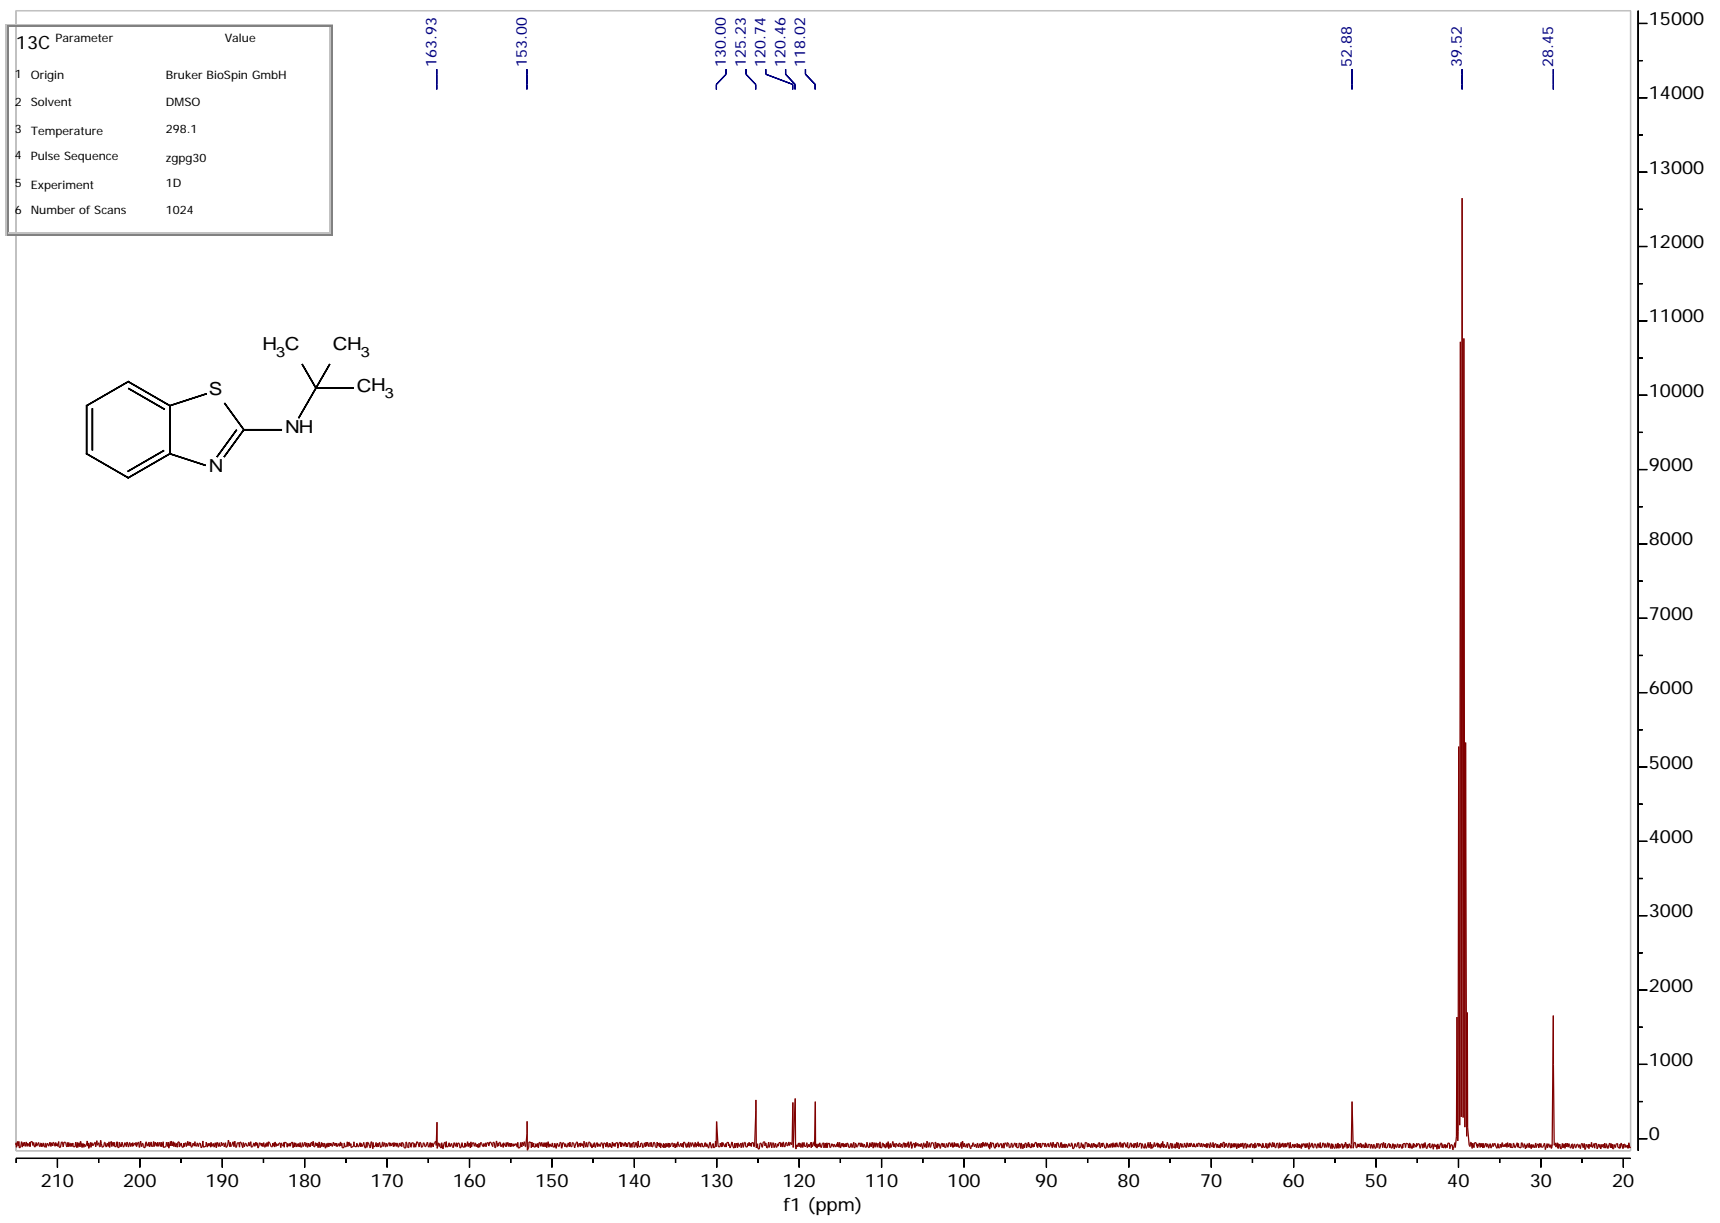

# *N*-tert-butyl--5-chloro-1,3-benzothiazol-2-amine (3b)

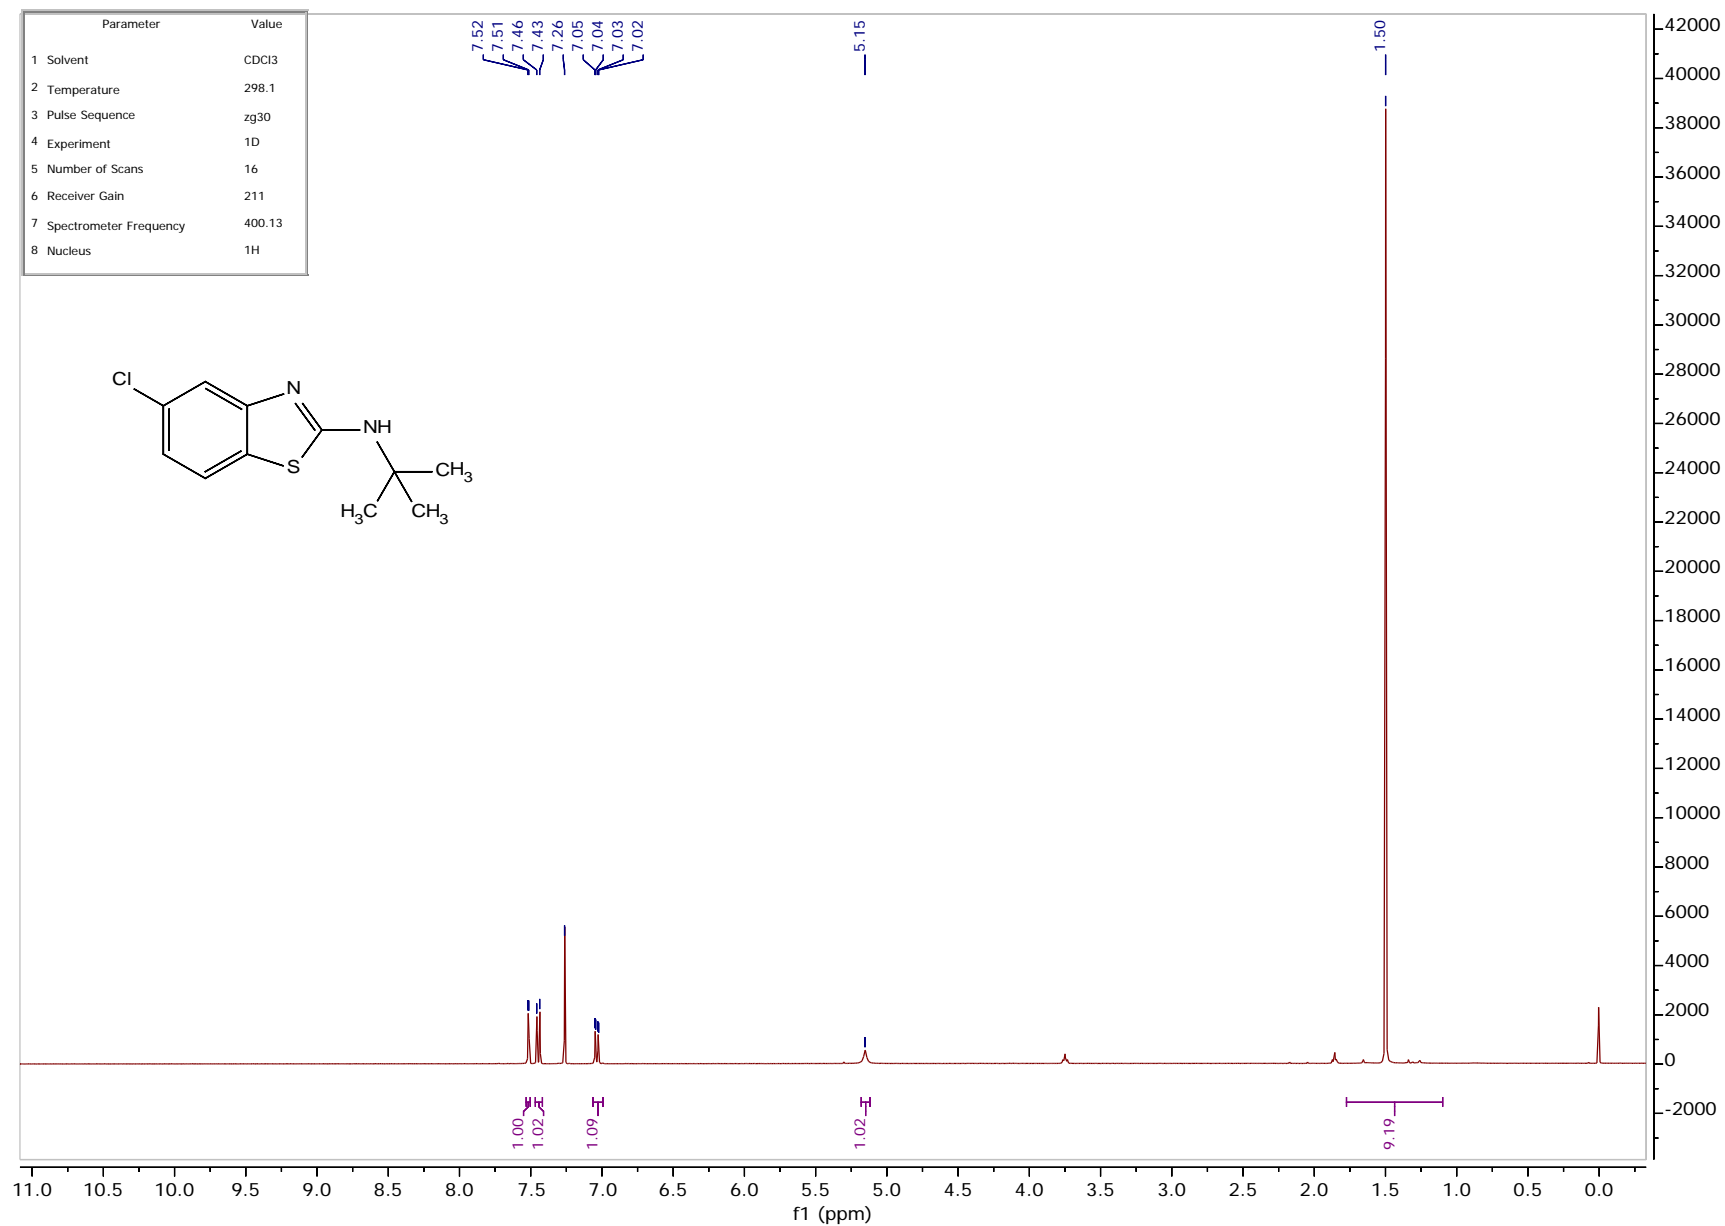

| Parameter                | Value  |
|--------------------------|--------|
| 1 Solvent                | CDCl3  |
| 2 Temperature            | 298.1  |
| 3 Pulse Sequence         | zgpg30 |
| 4 Experiment             | 1D     |
| 5 Number of Scans        | 1024   |
| 6 Receiver Gain          | 211    |
| 7 Spectrometer Frequency | 100.62 |

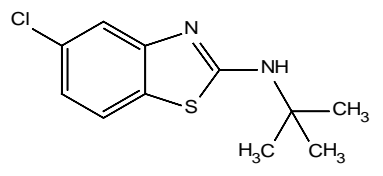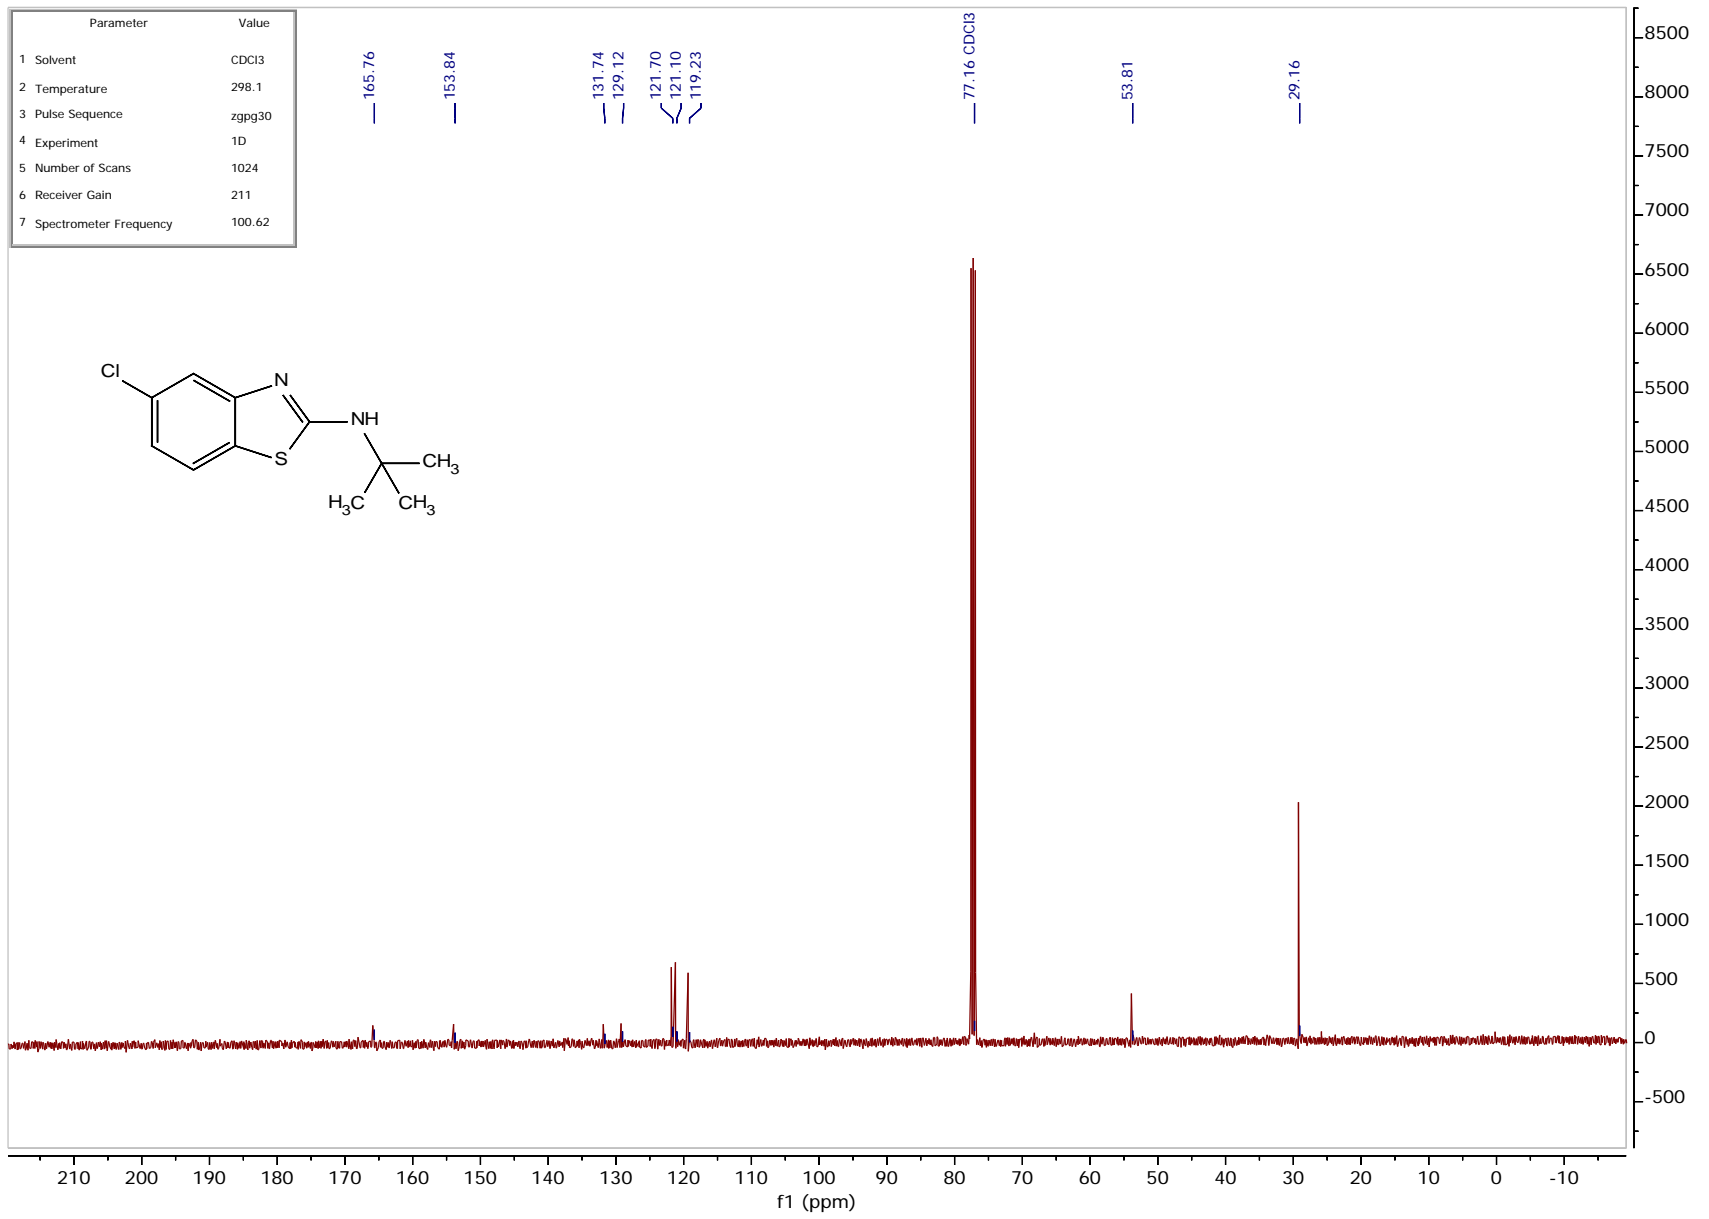

**N-(2,4,4-trimethylpentan-2-yl)-1,3-benzothiazol-2-amine (3c)**

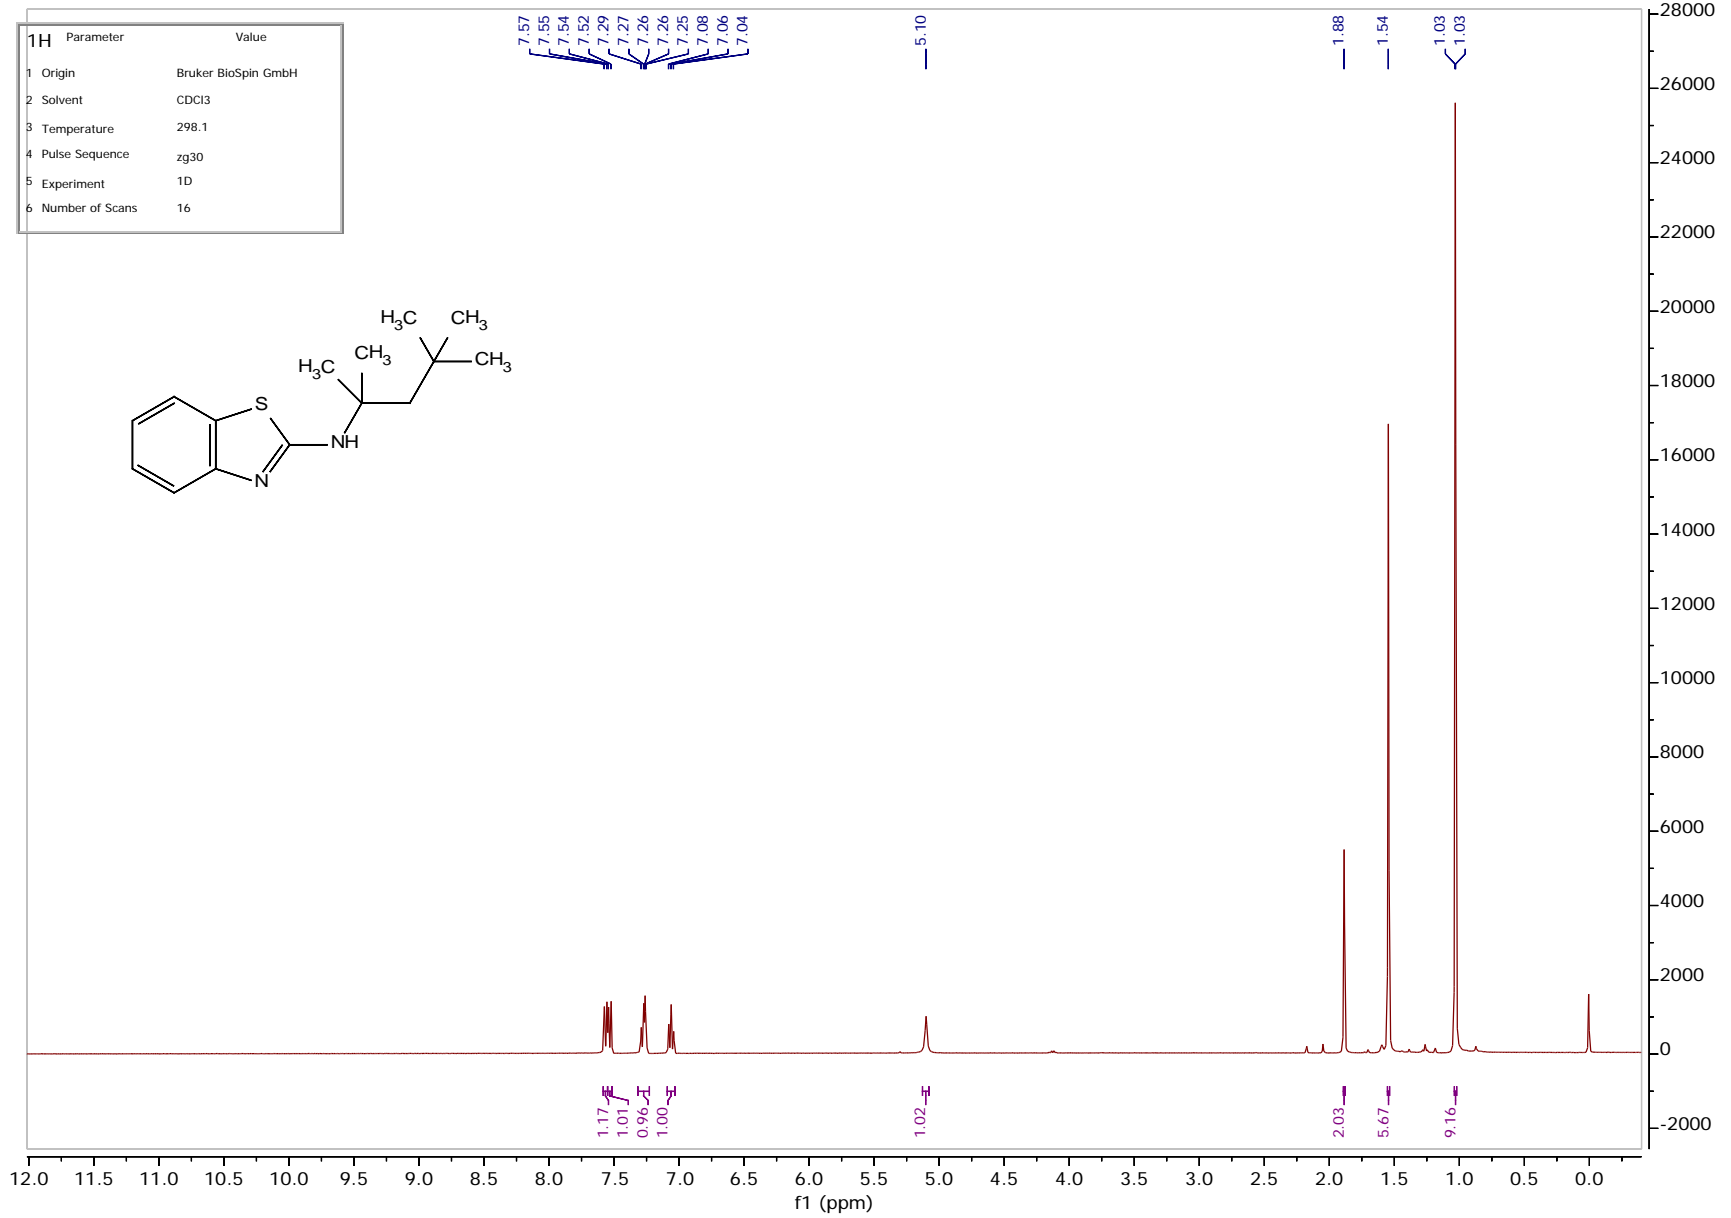

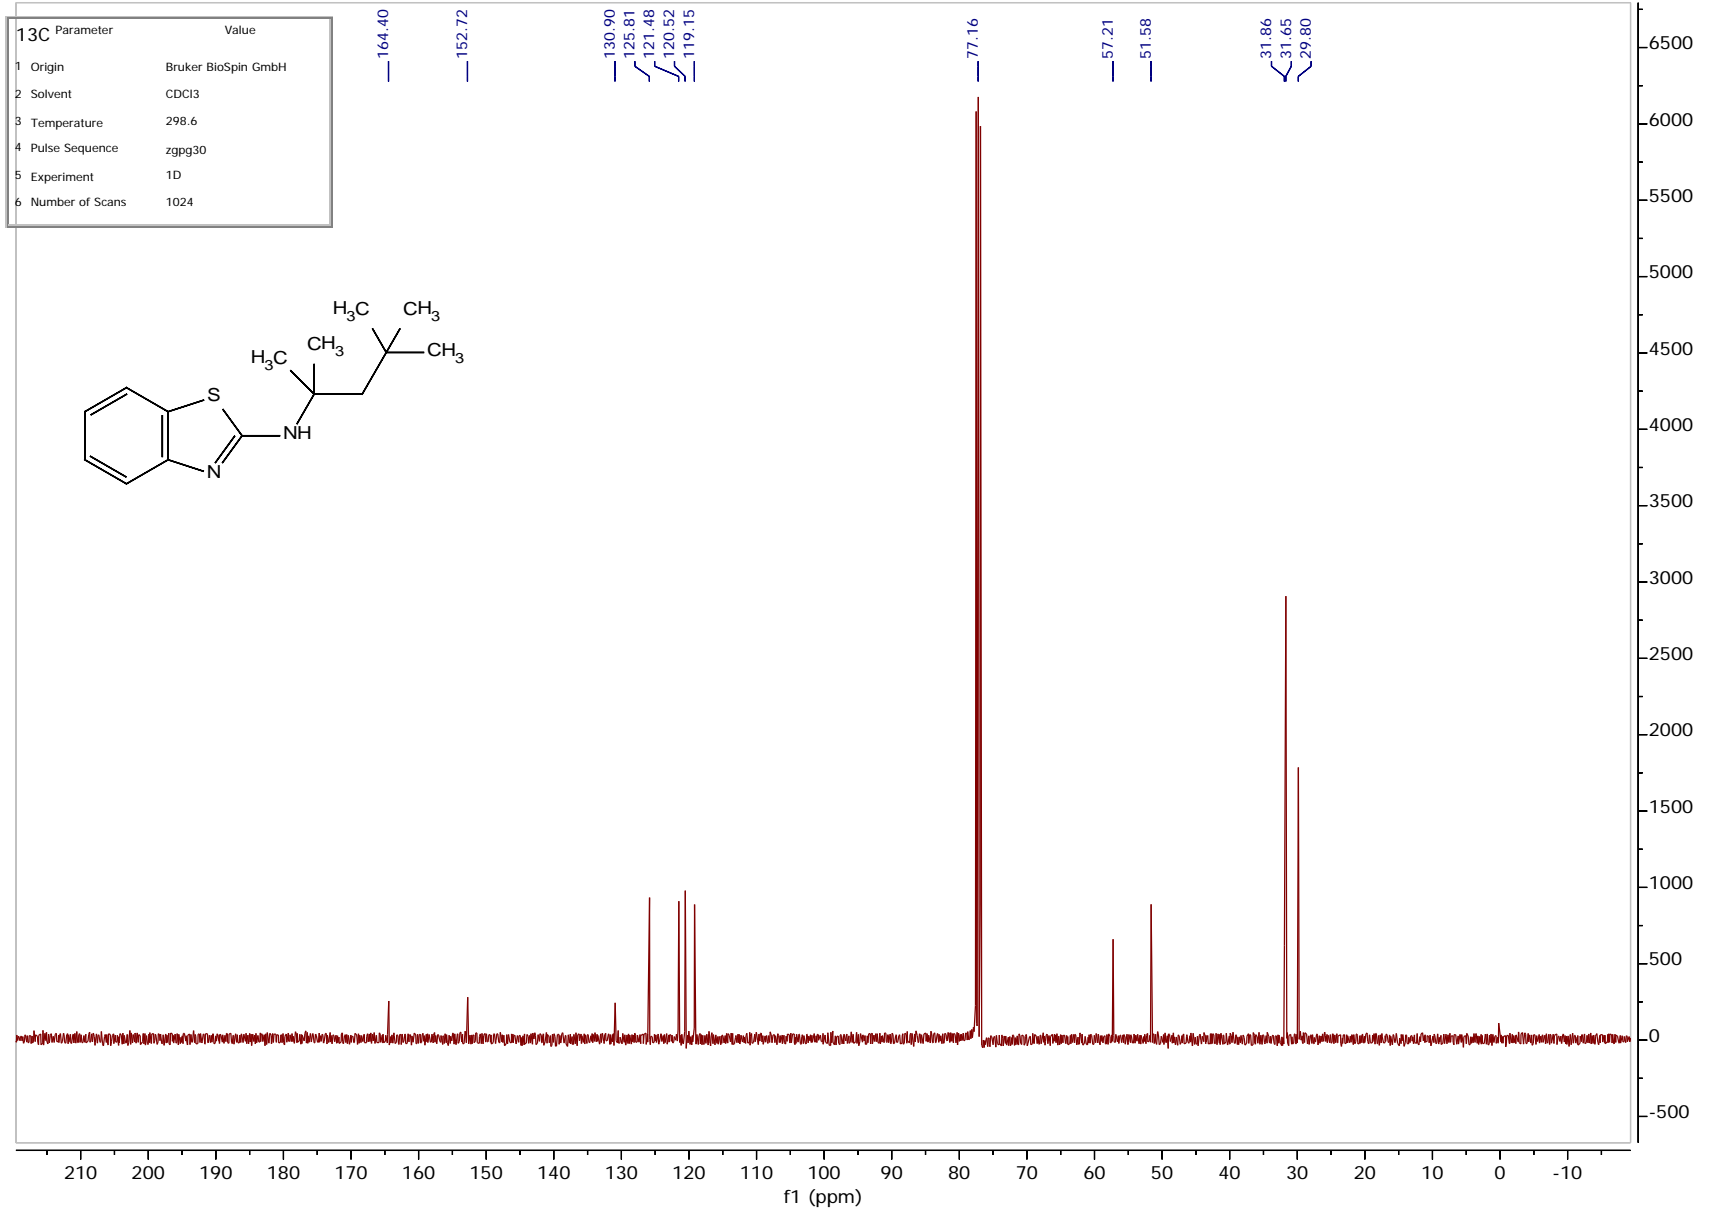

# N-cyclohexyl-1,3-benzothiazol-2-amine (3d)

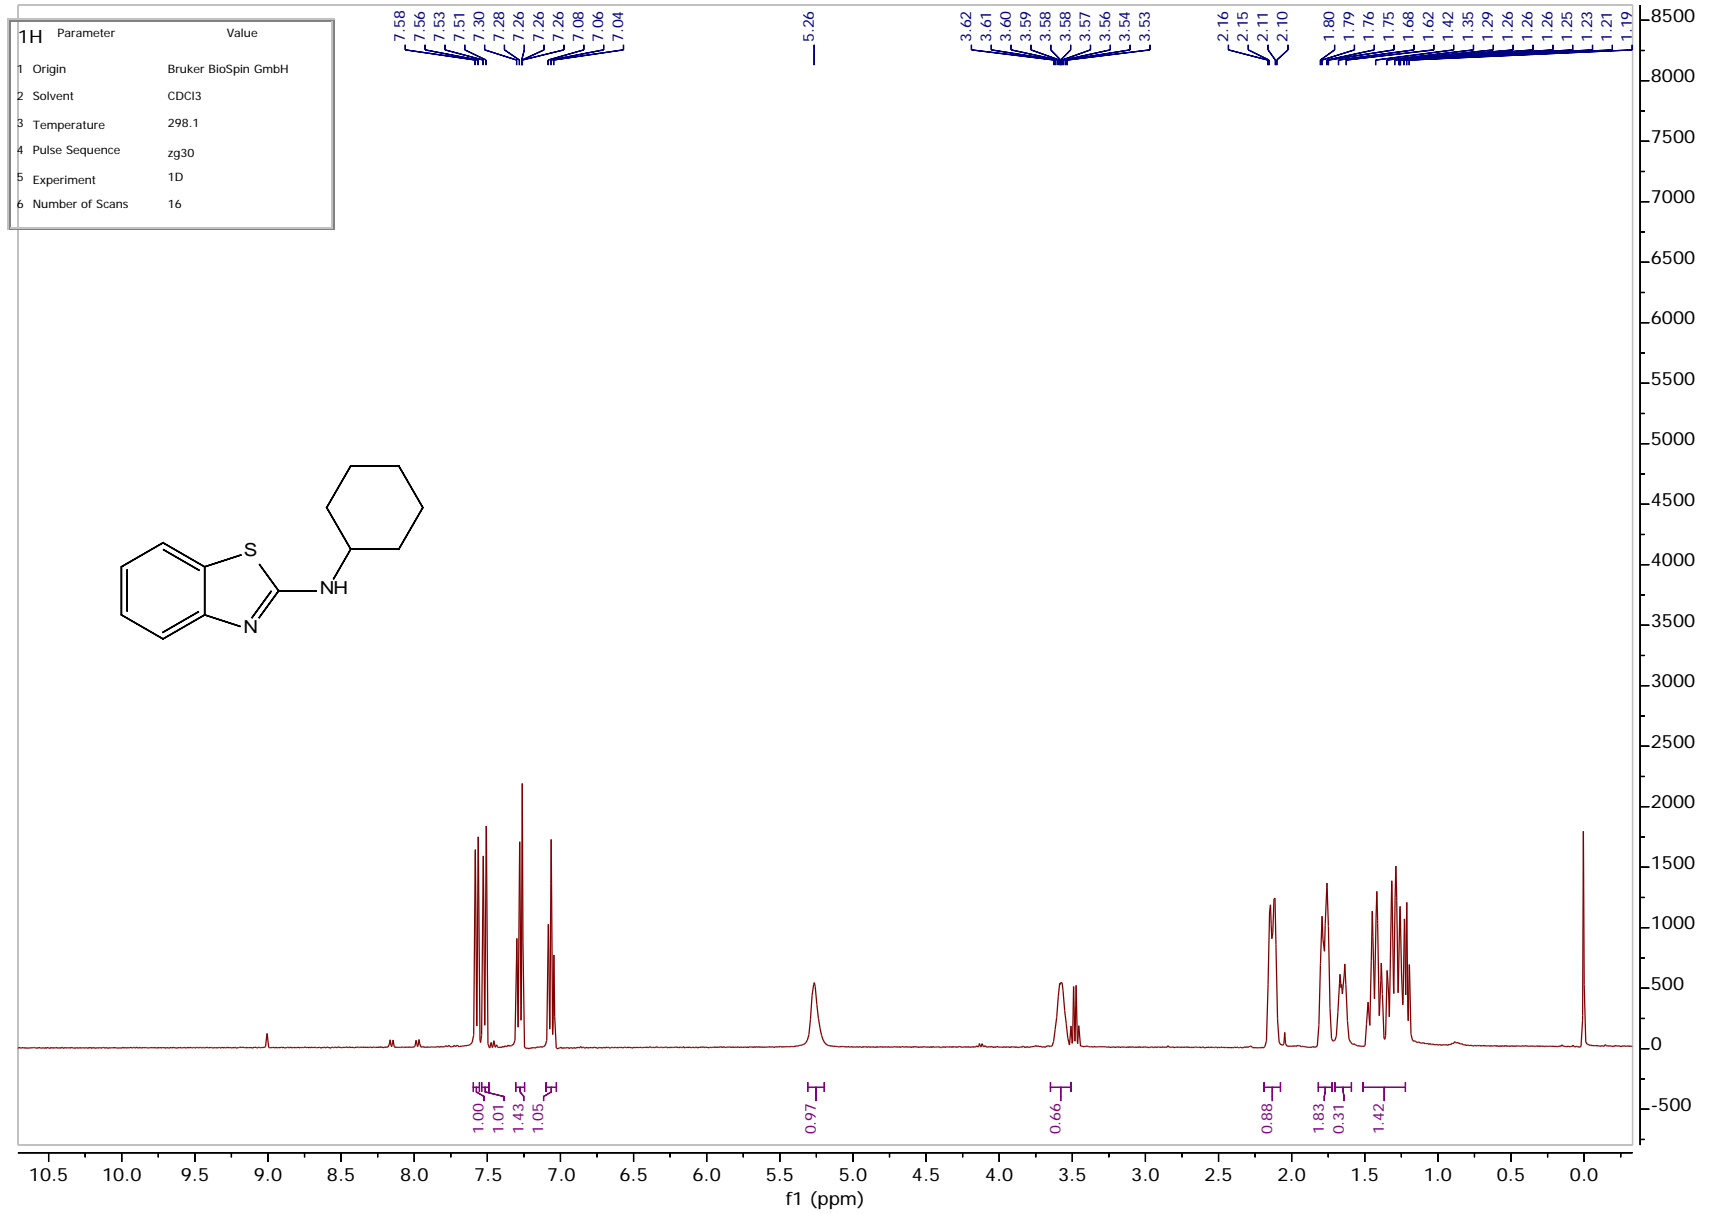



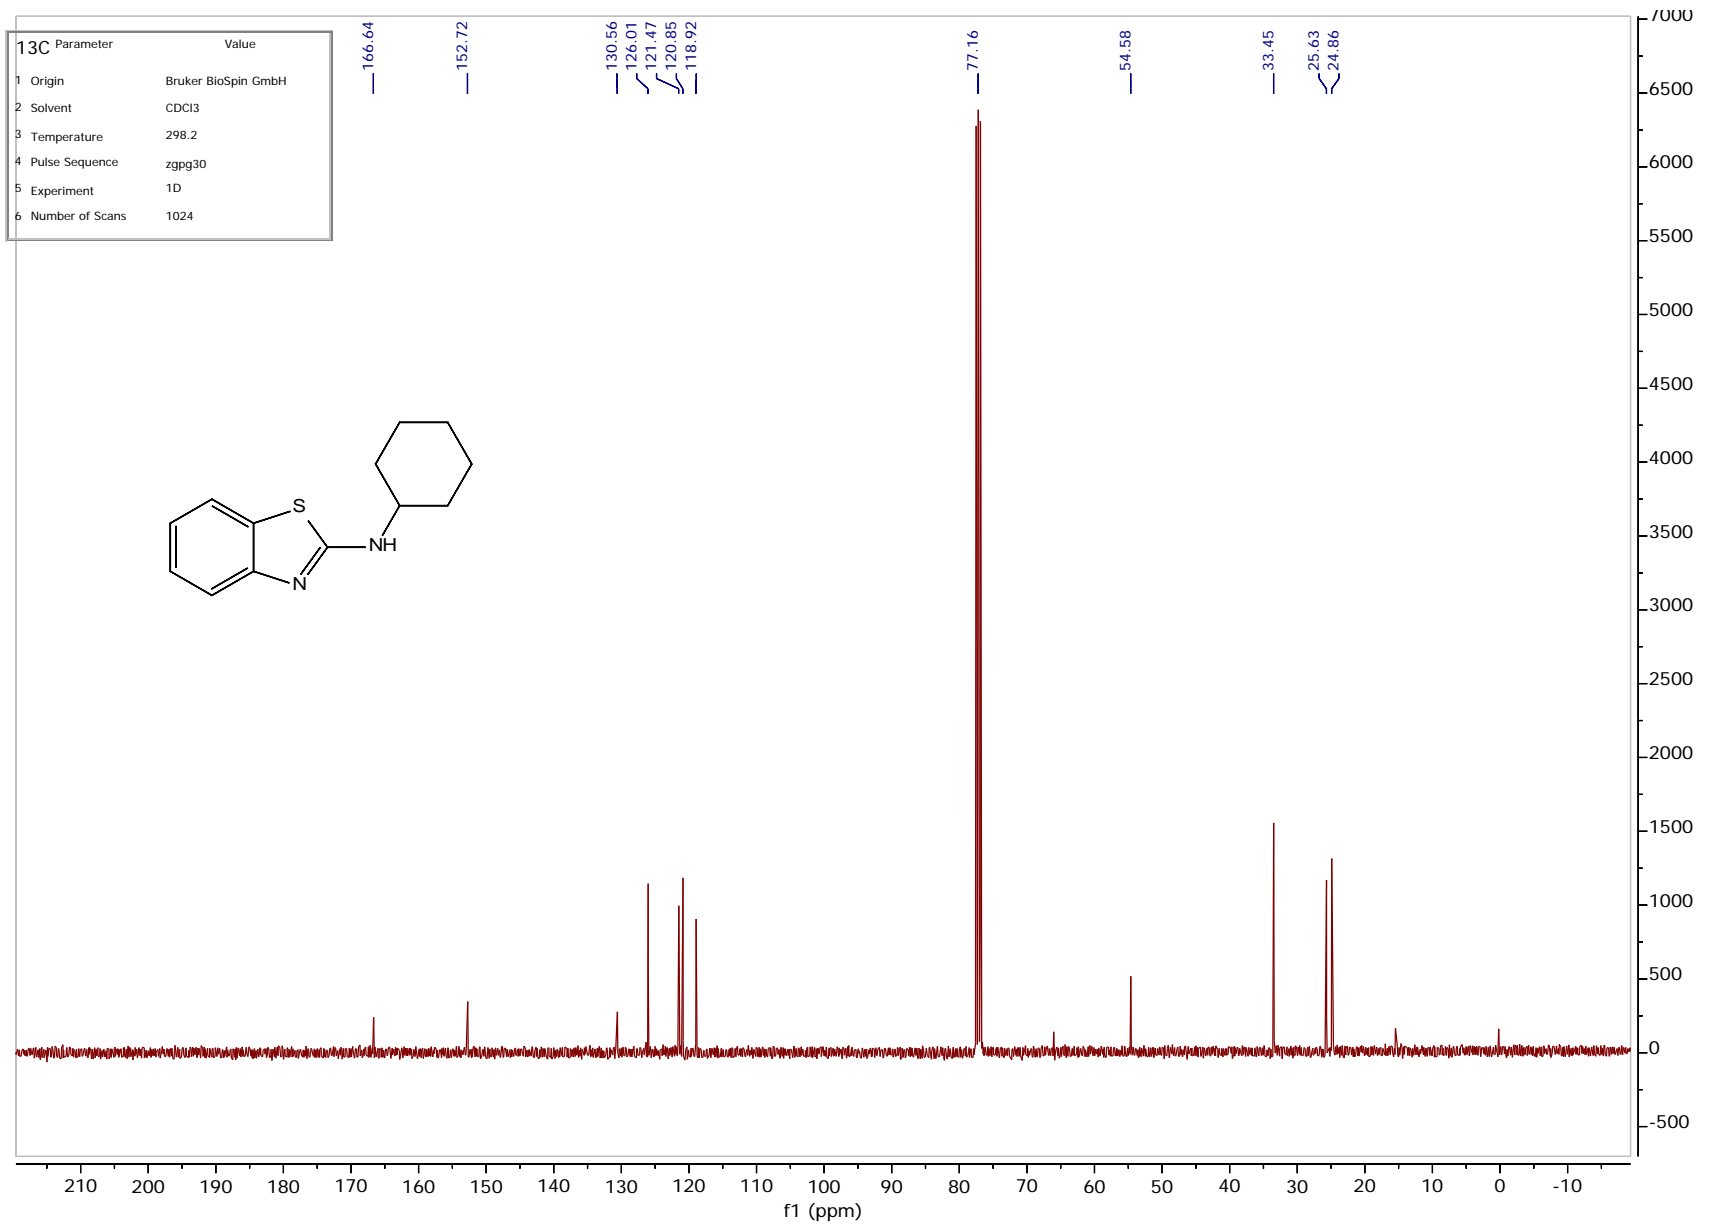

# N-butyl-1,3-benzothiazol-2-amine (3e)

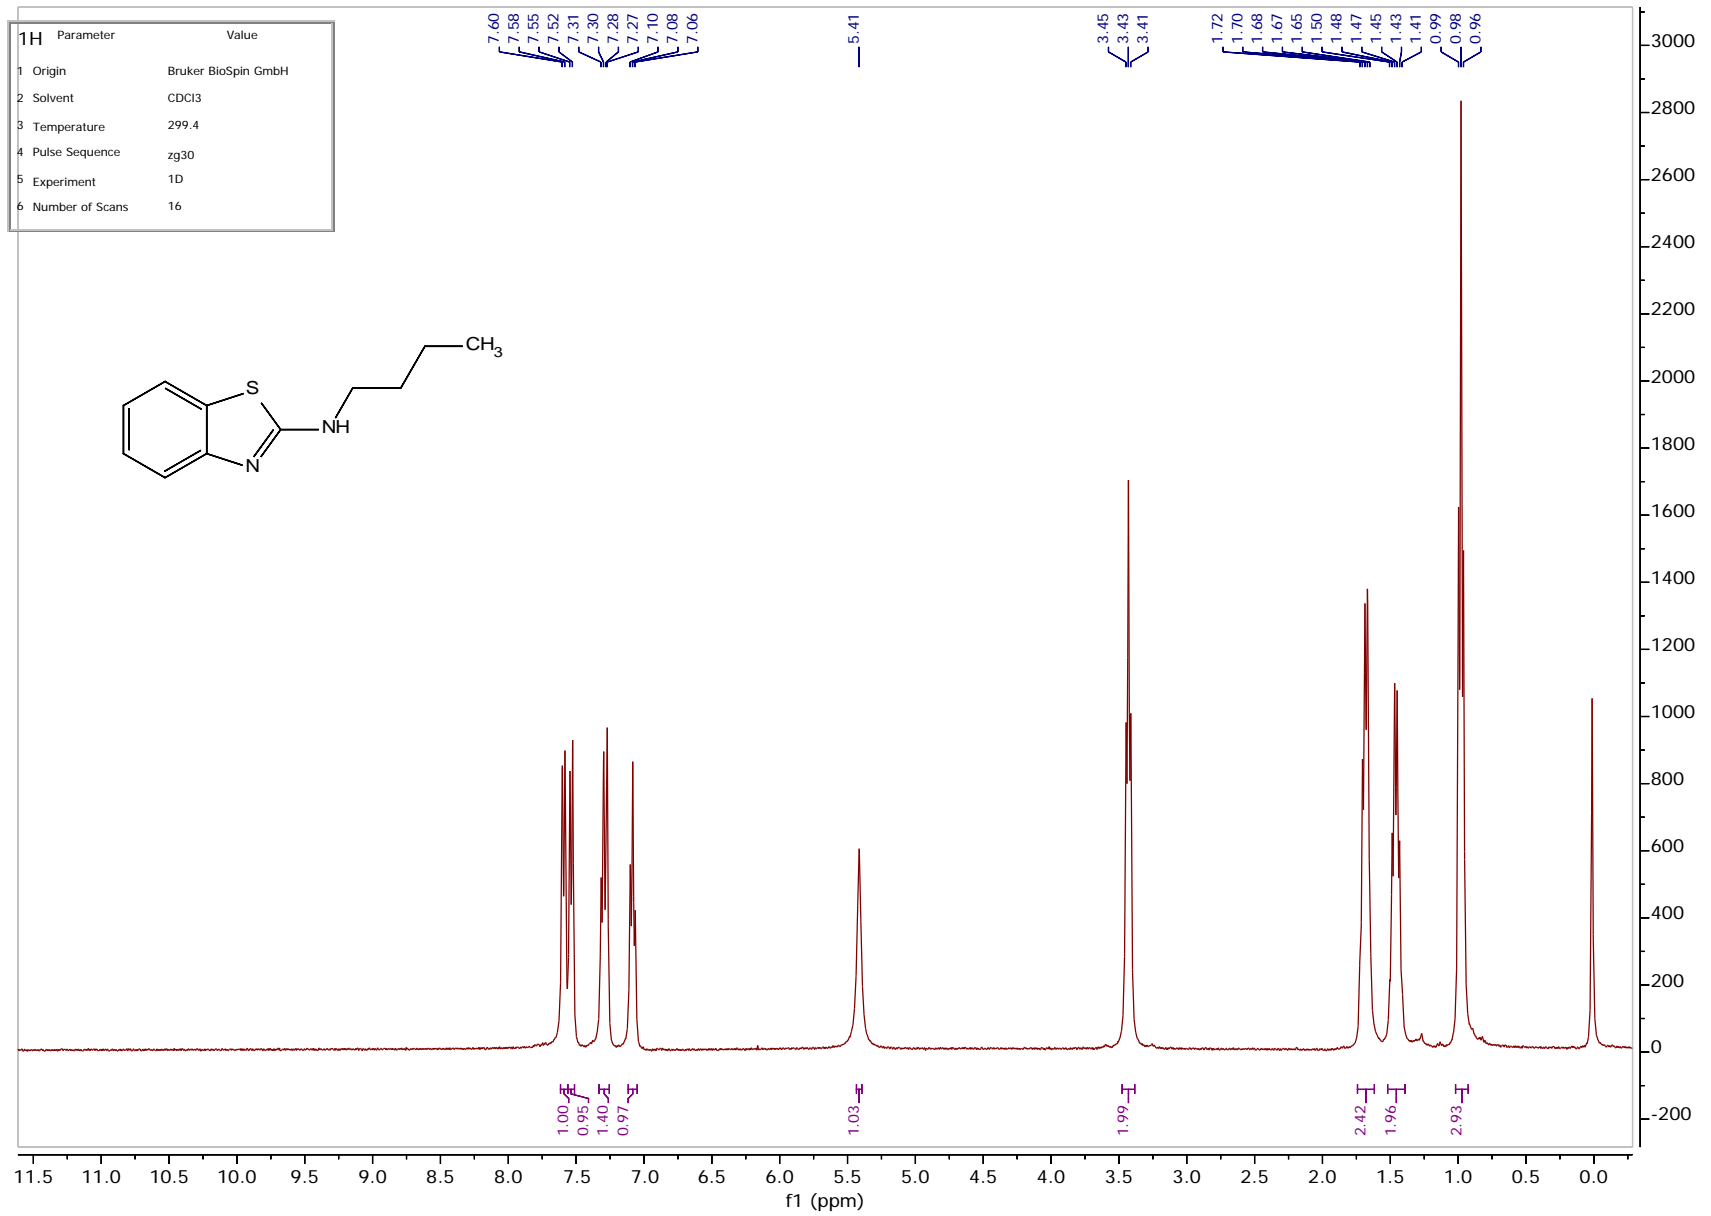

| <sup>13</sup> C | Parameter       | Value               |
|-----------------|-----------------|---------------------|
| 1               | Origin          | Bruker BioSpin GmbH |
| 2               | Solvent         | CDCl <sub>3</sub>   |
| 3               | Temperature     | 300.1               |
| 4               | Pulse Sequence  | zgpg30              |
| 5               | Experiment      | 1D                  |
| 6               | Number of Scans | 1024                |

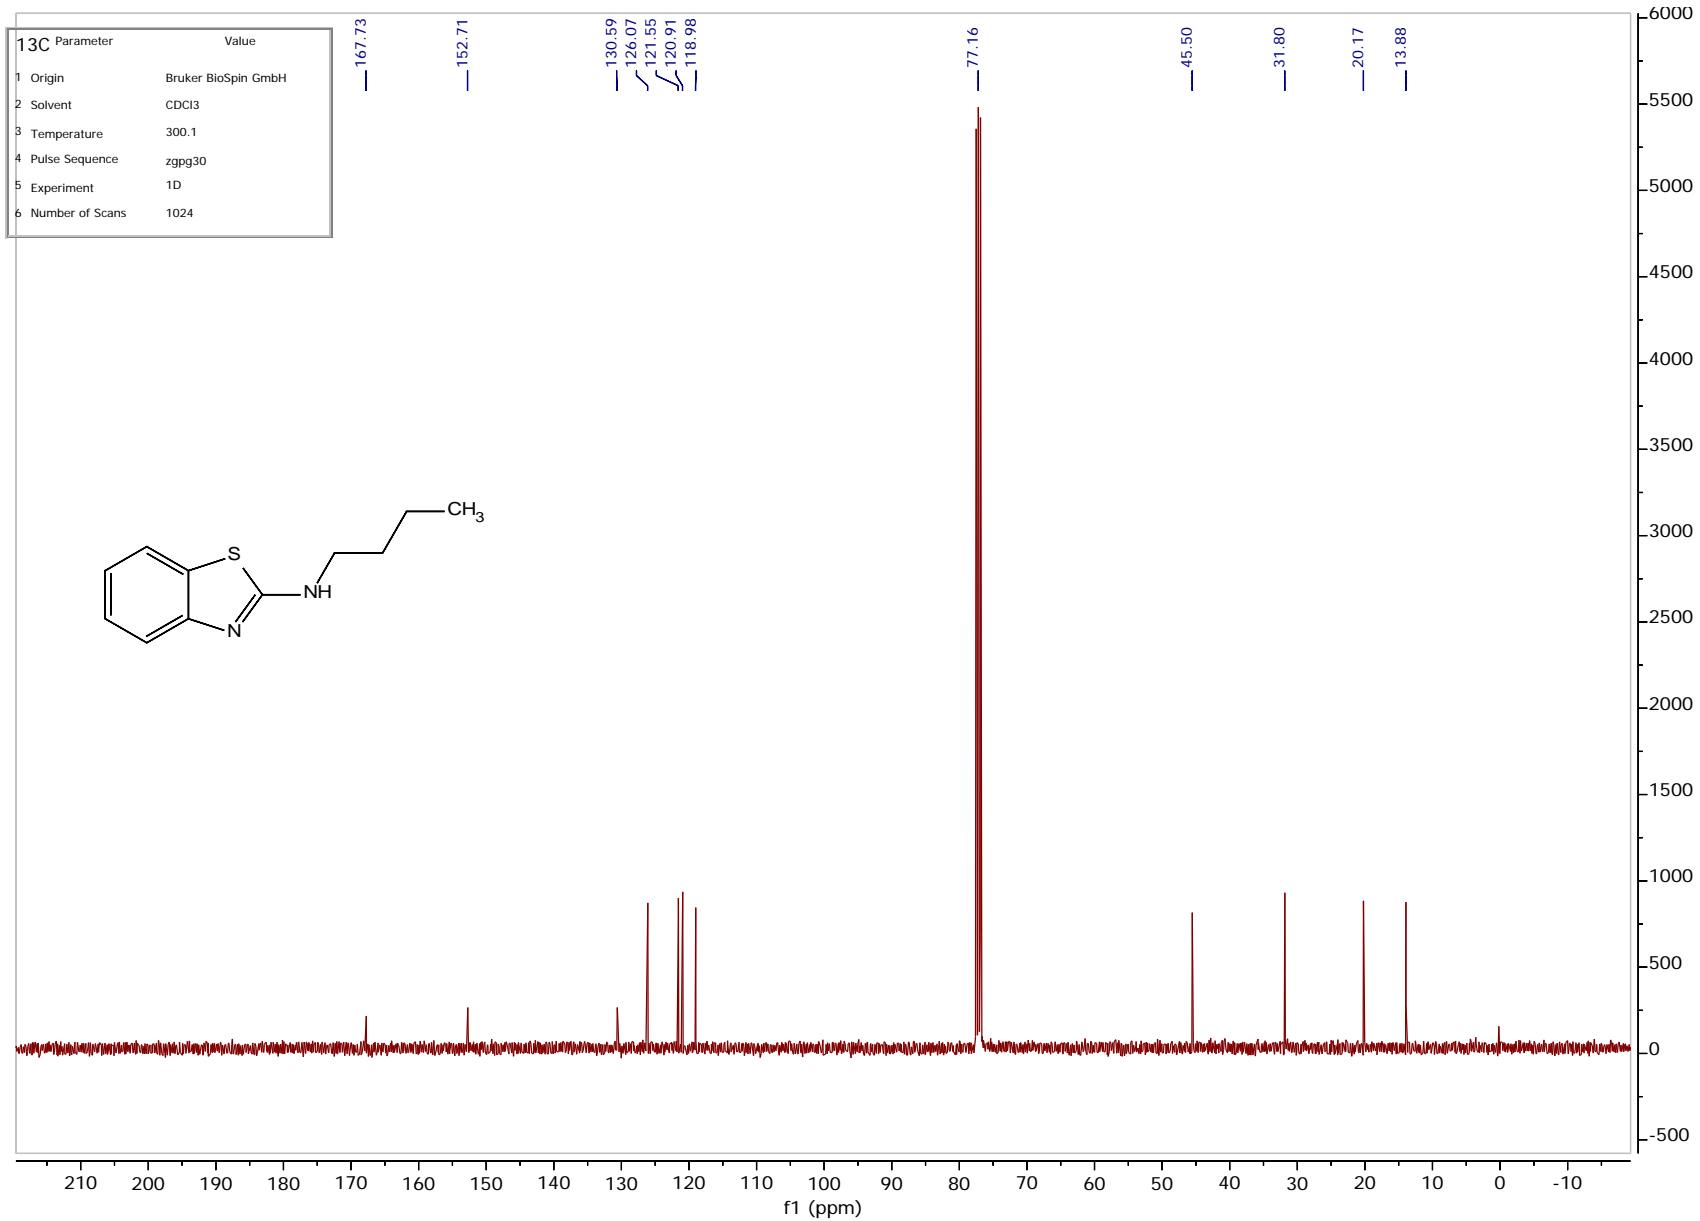

### N-benzyl-1,3-benzothiazol-2-amine (3f)

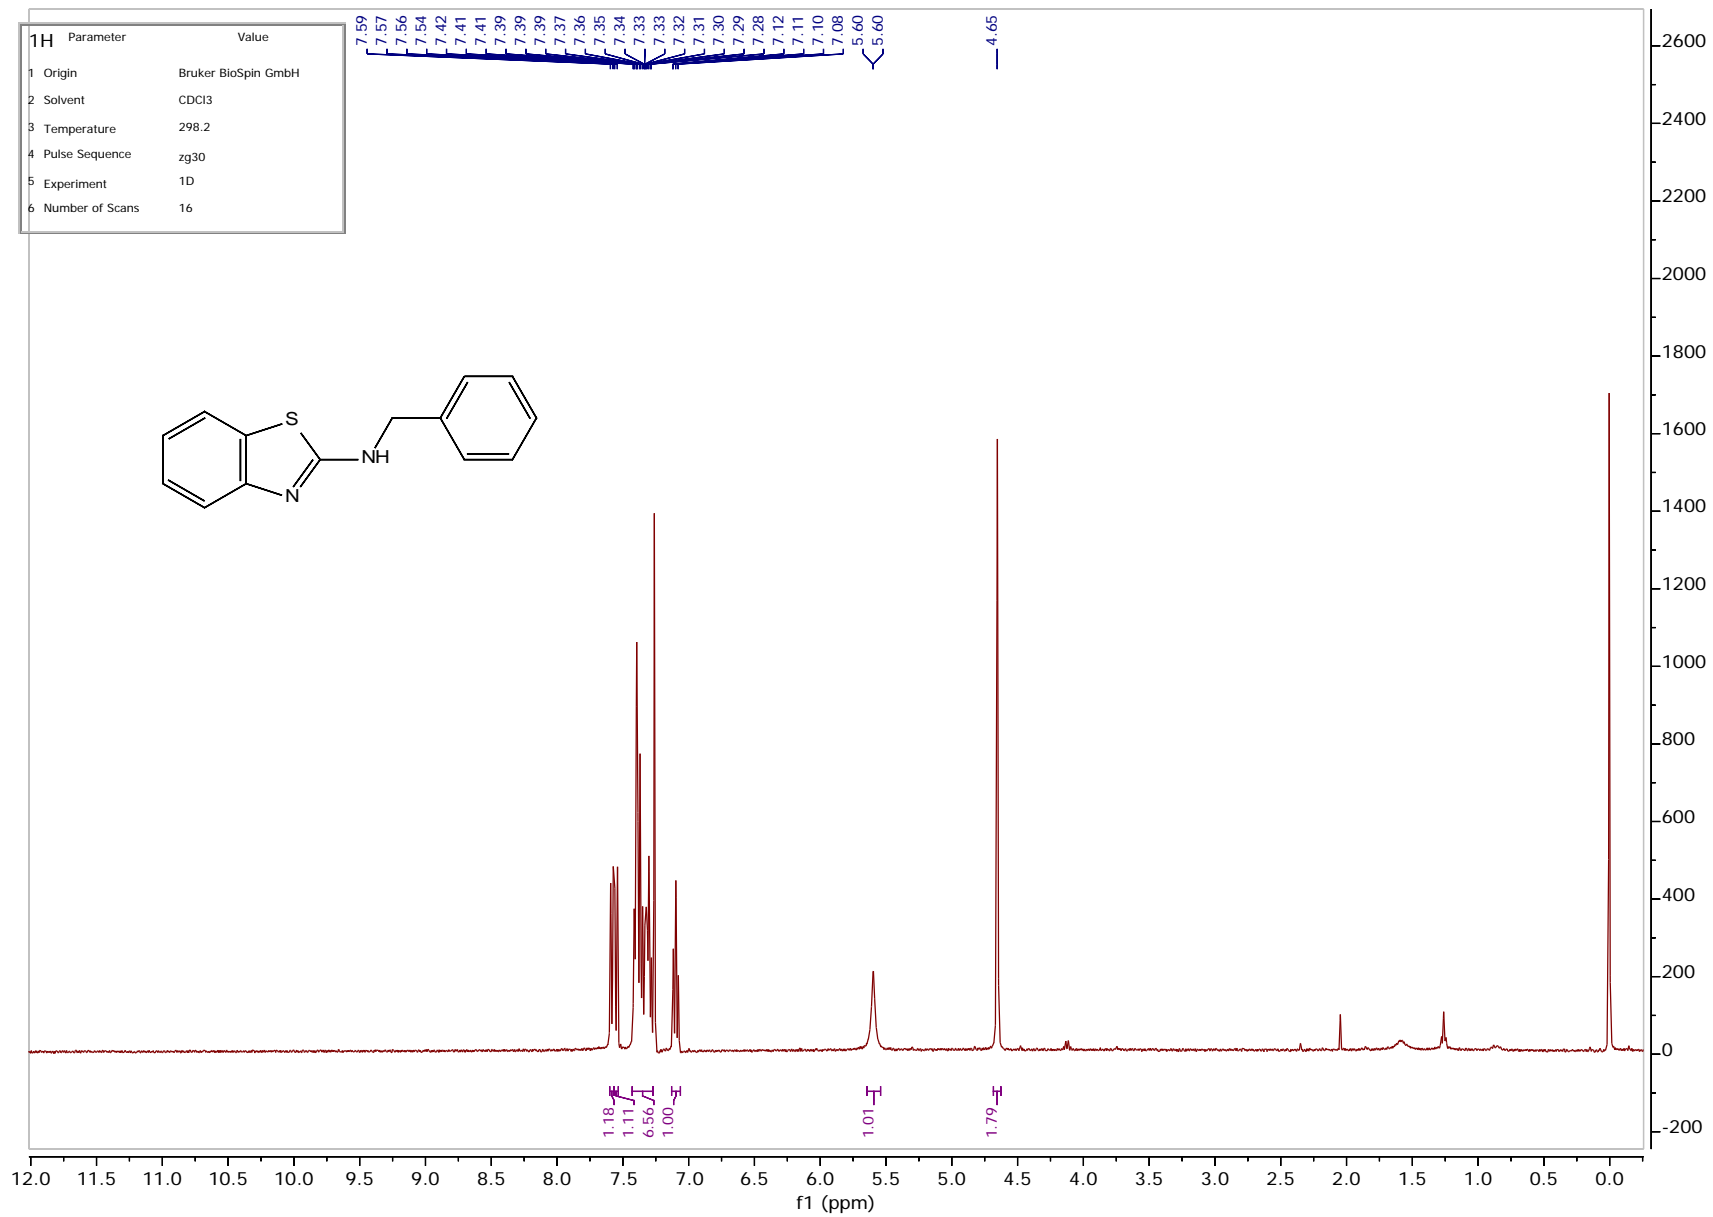

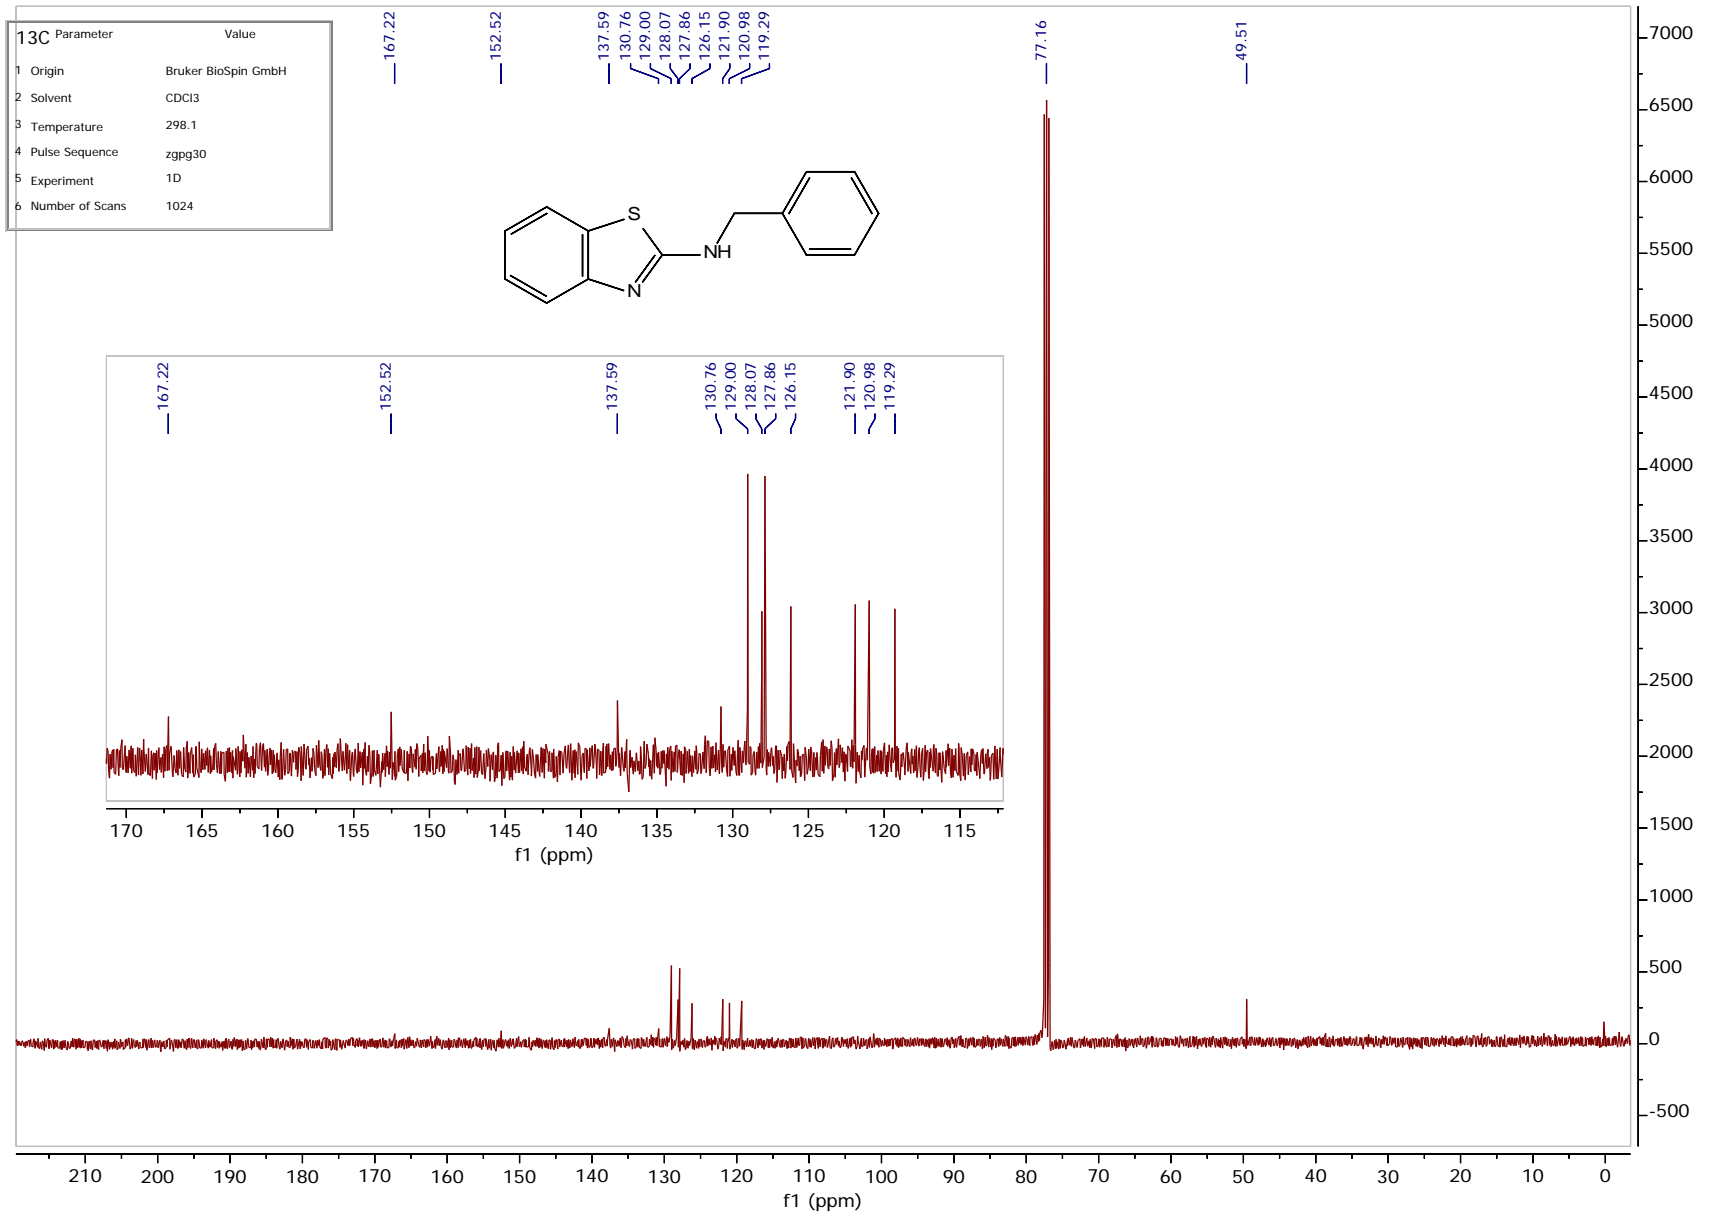

# N-phenyl-1,3-benzothiazol-2-amine (3g)

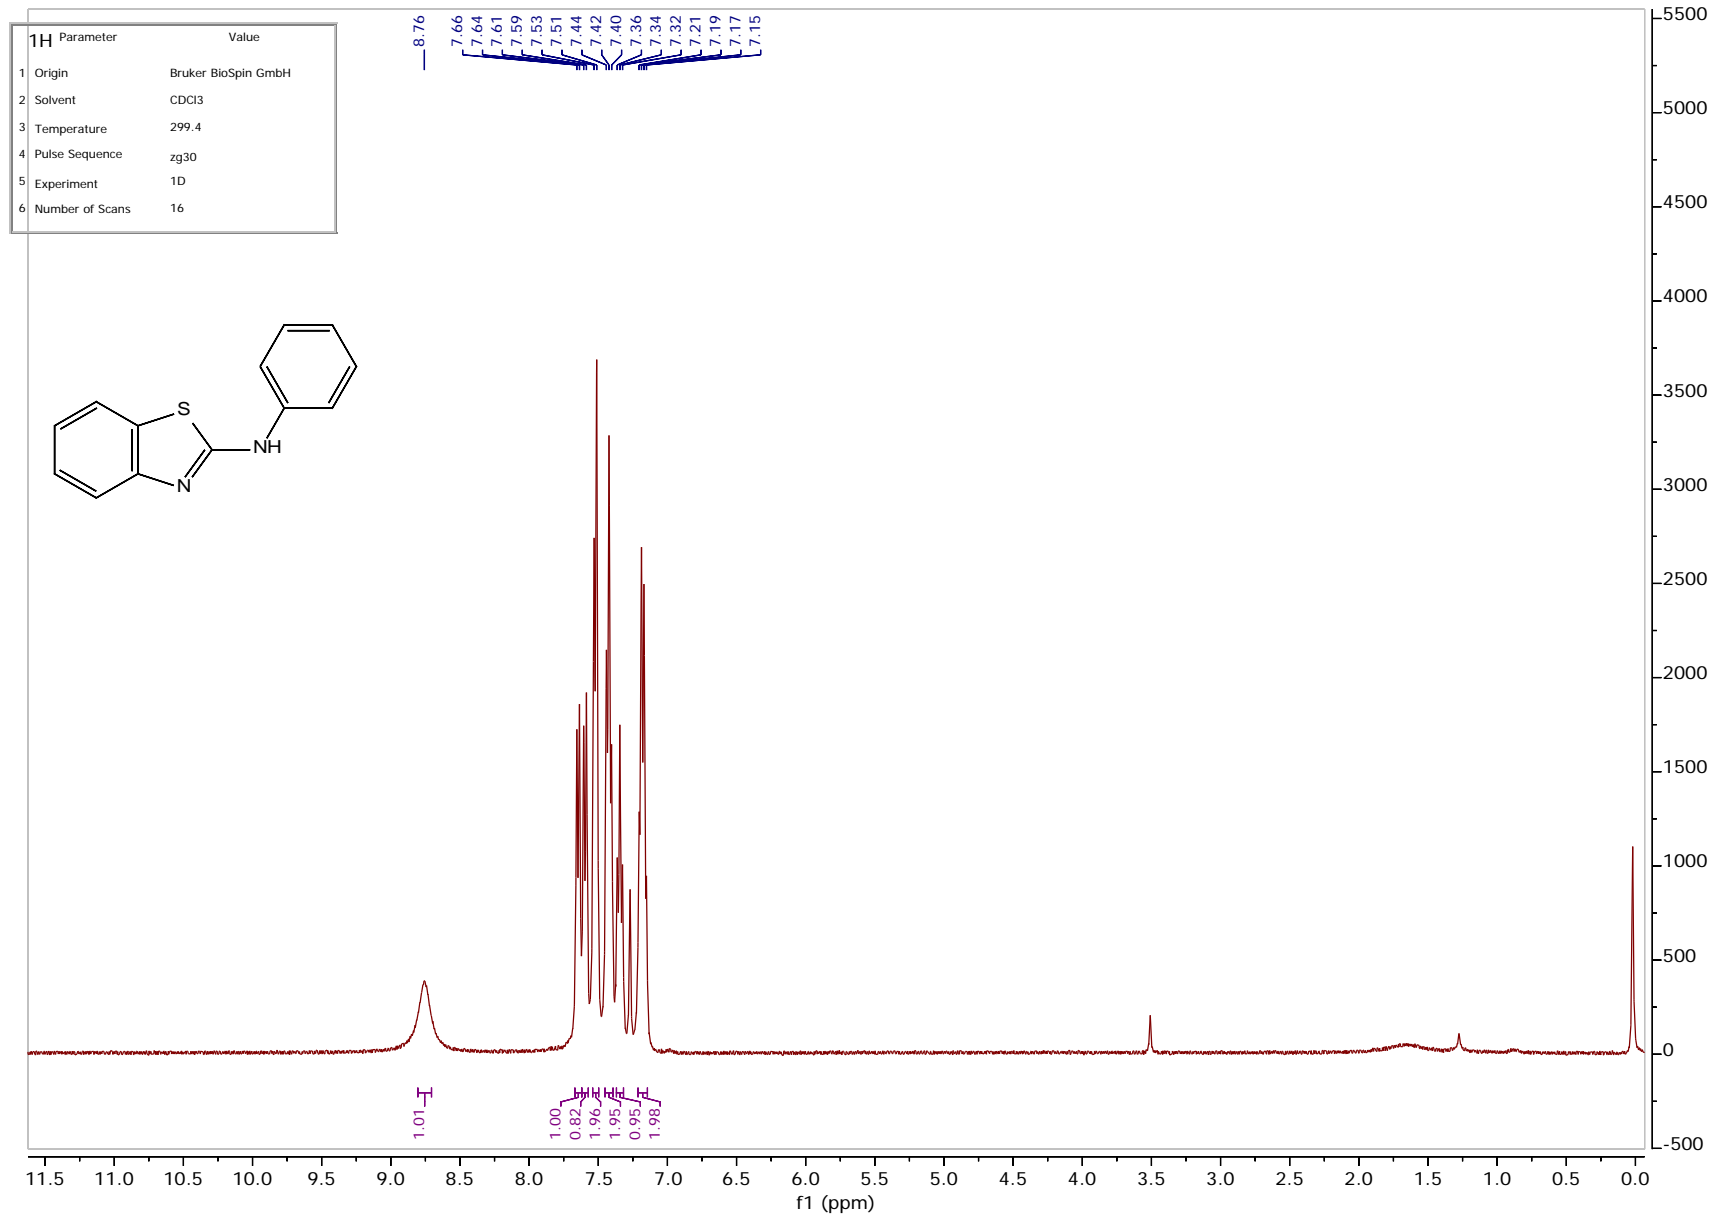

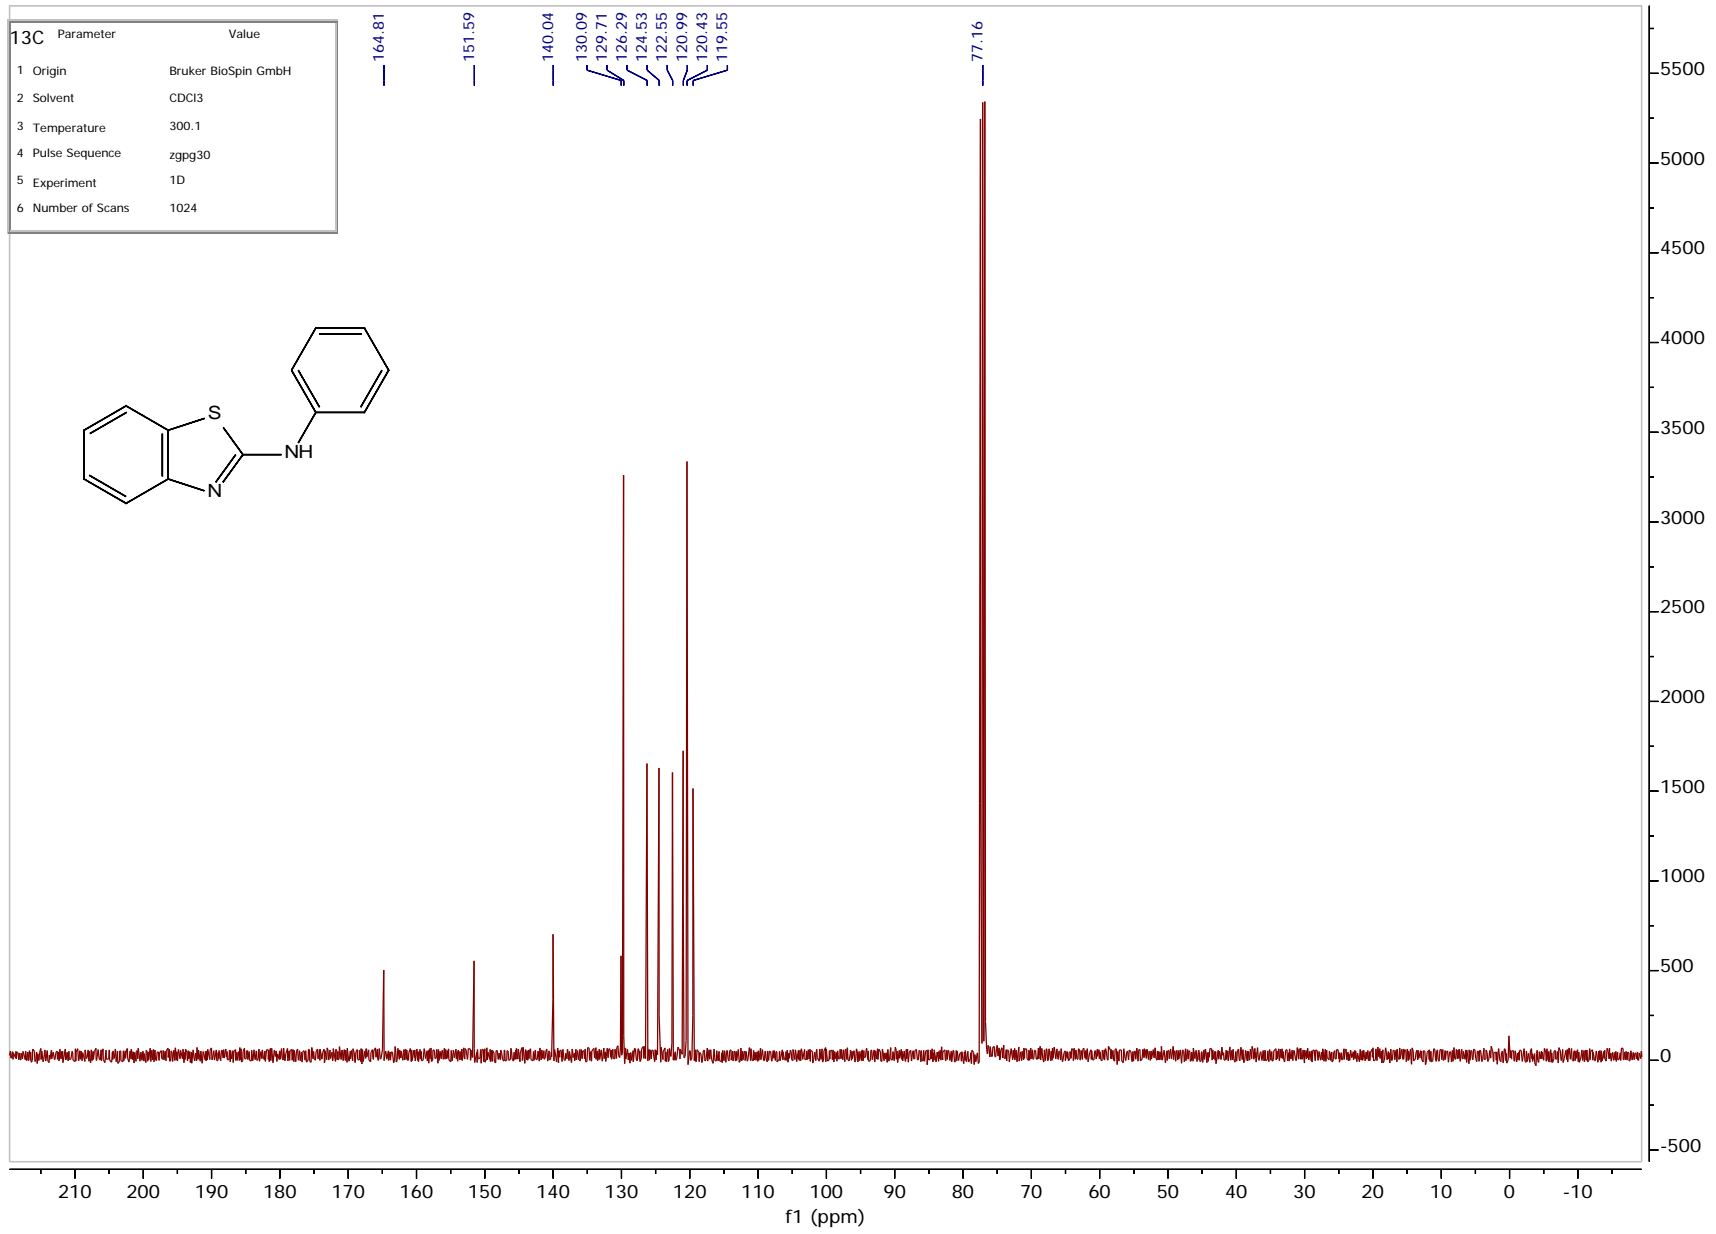

### *N*-(4-methoxyphenyl)-1,3-benzothiazol-2-amine (3h)

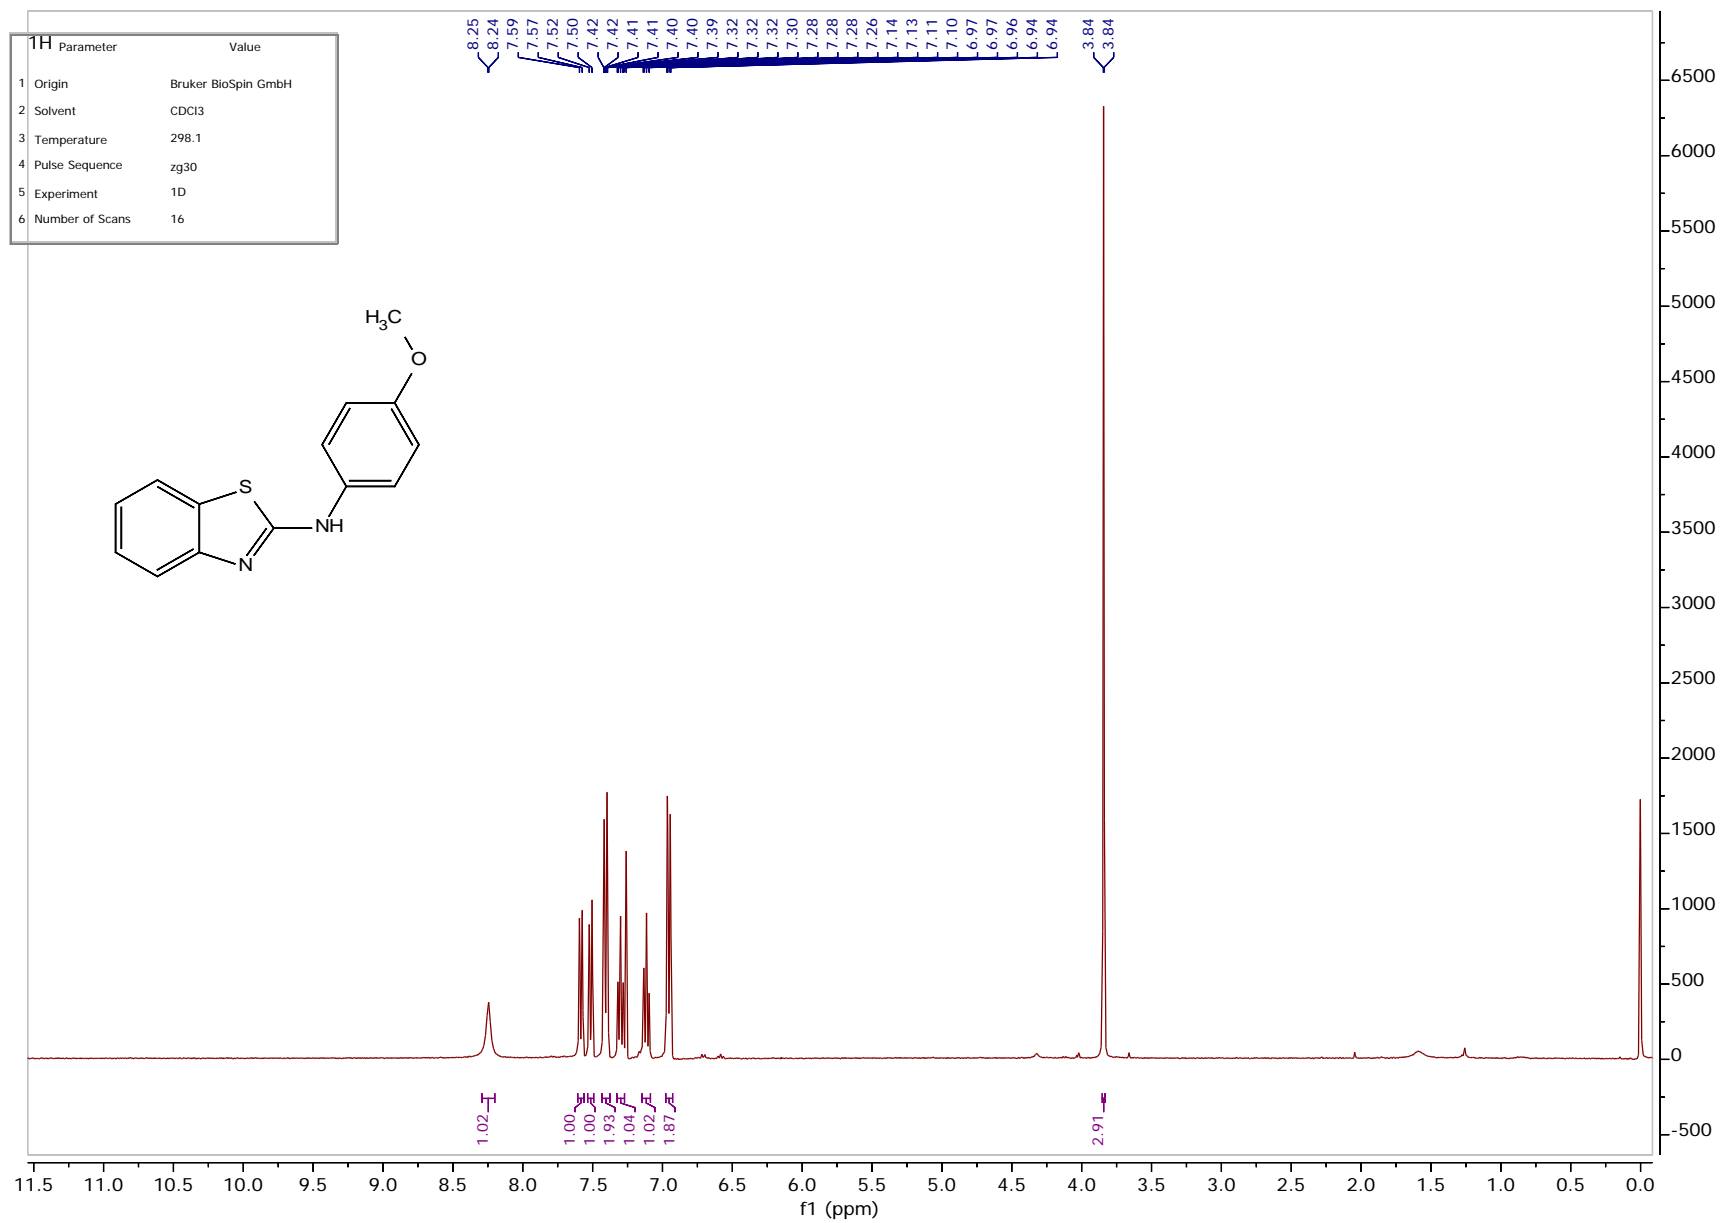



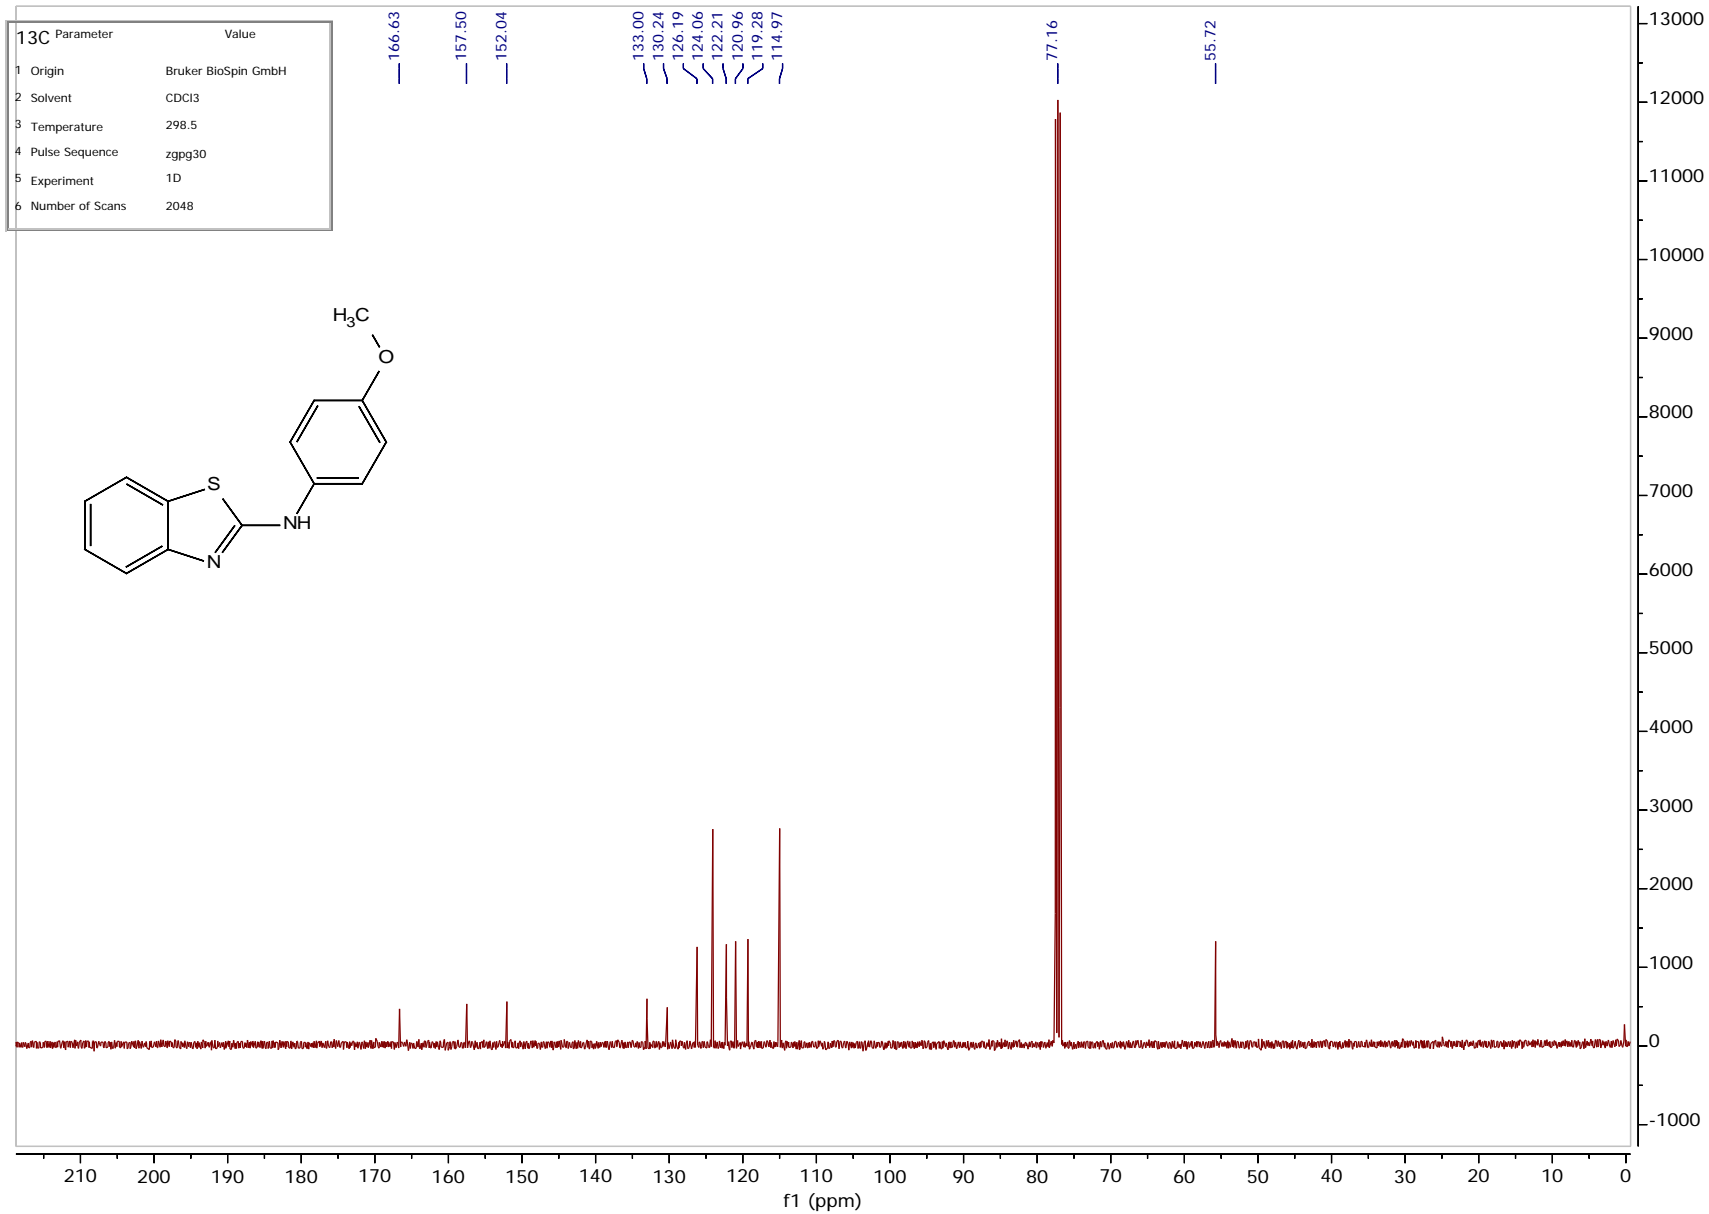

### *N*-(4-bromophenyl)-1,3-benzothiazol-2-amine (3i)

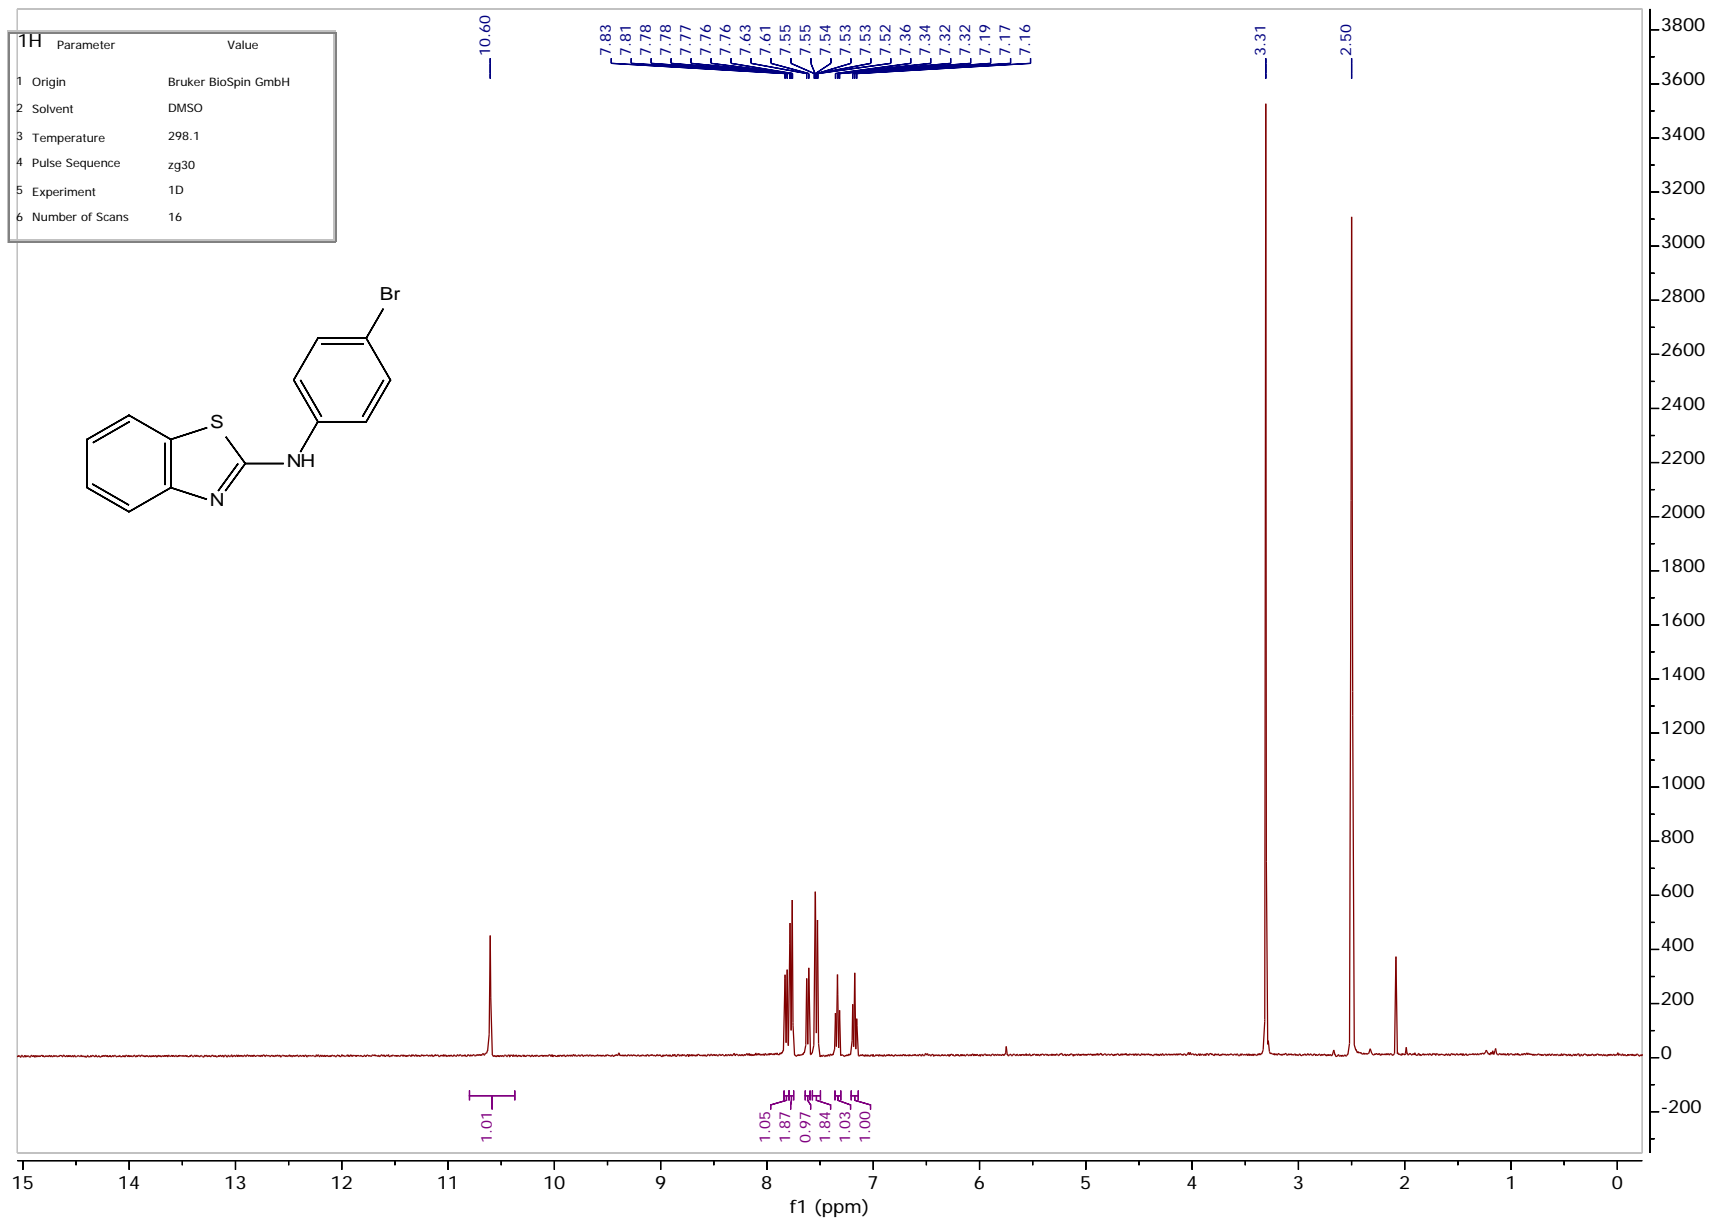

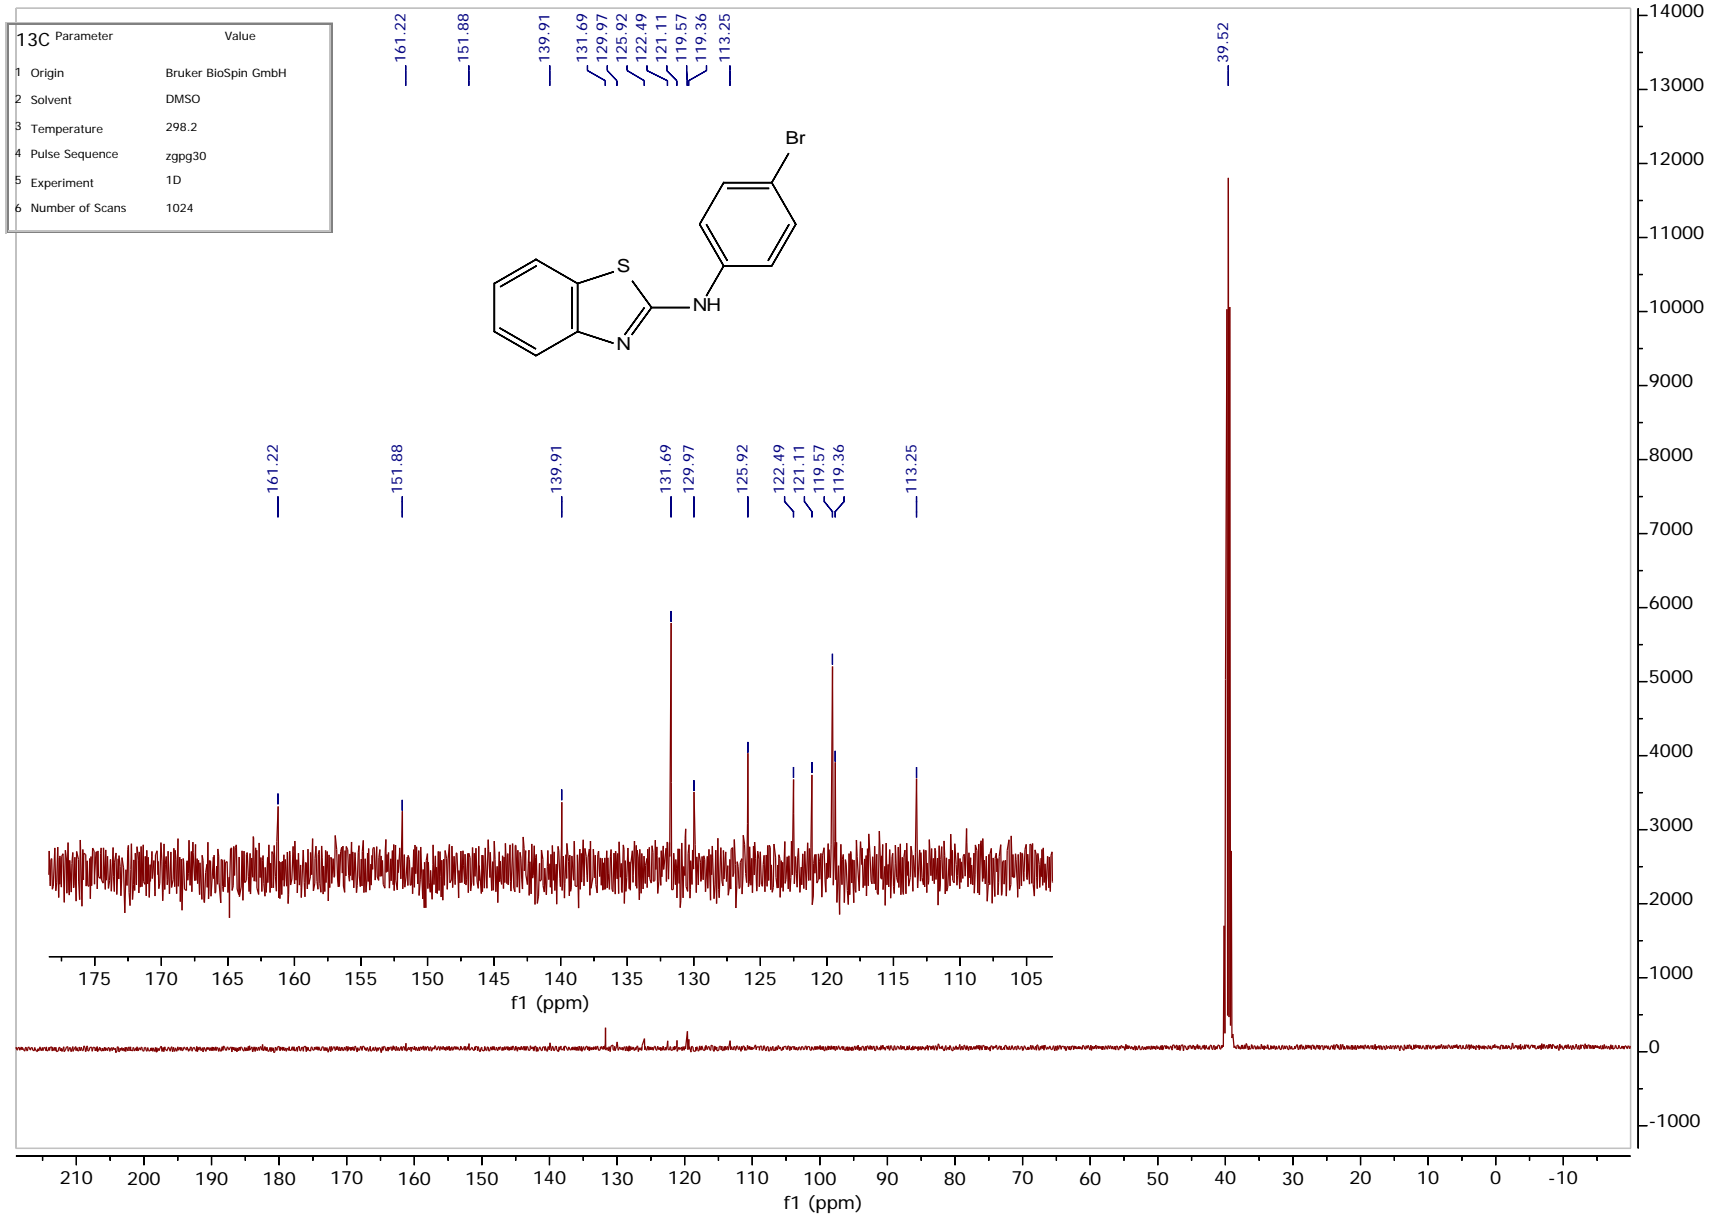

### Methyl 4-[(1,3-benzothiazol-2-yl)amino]benzoate (3j)

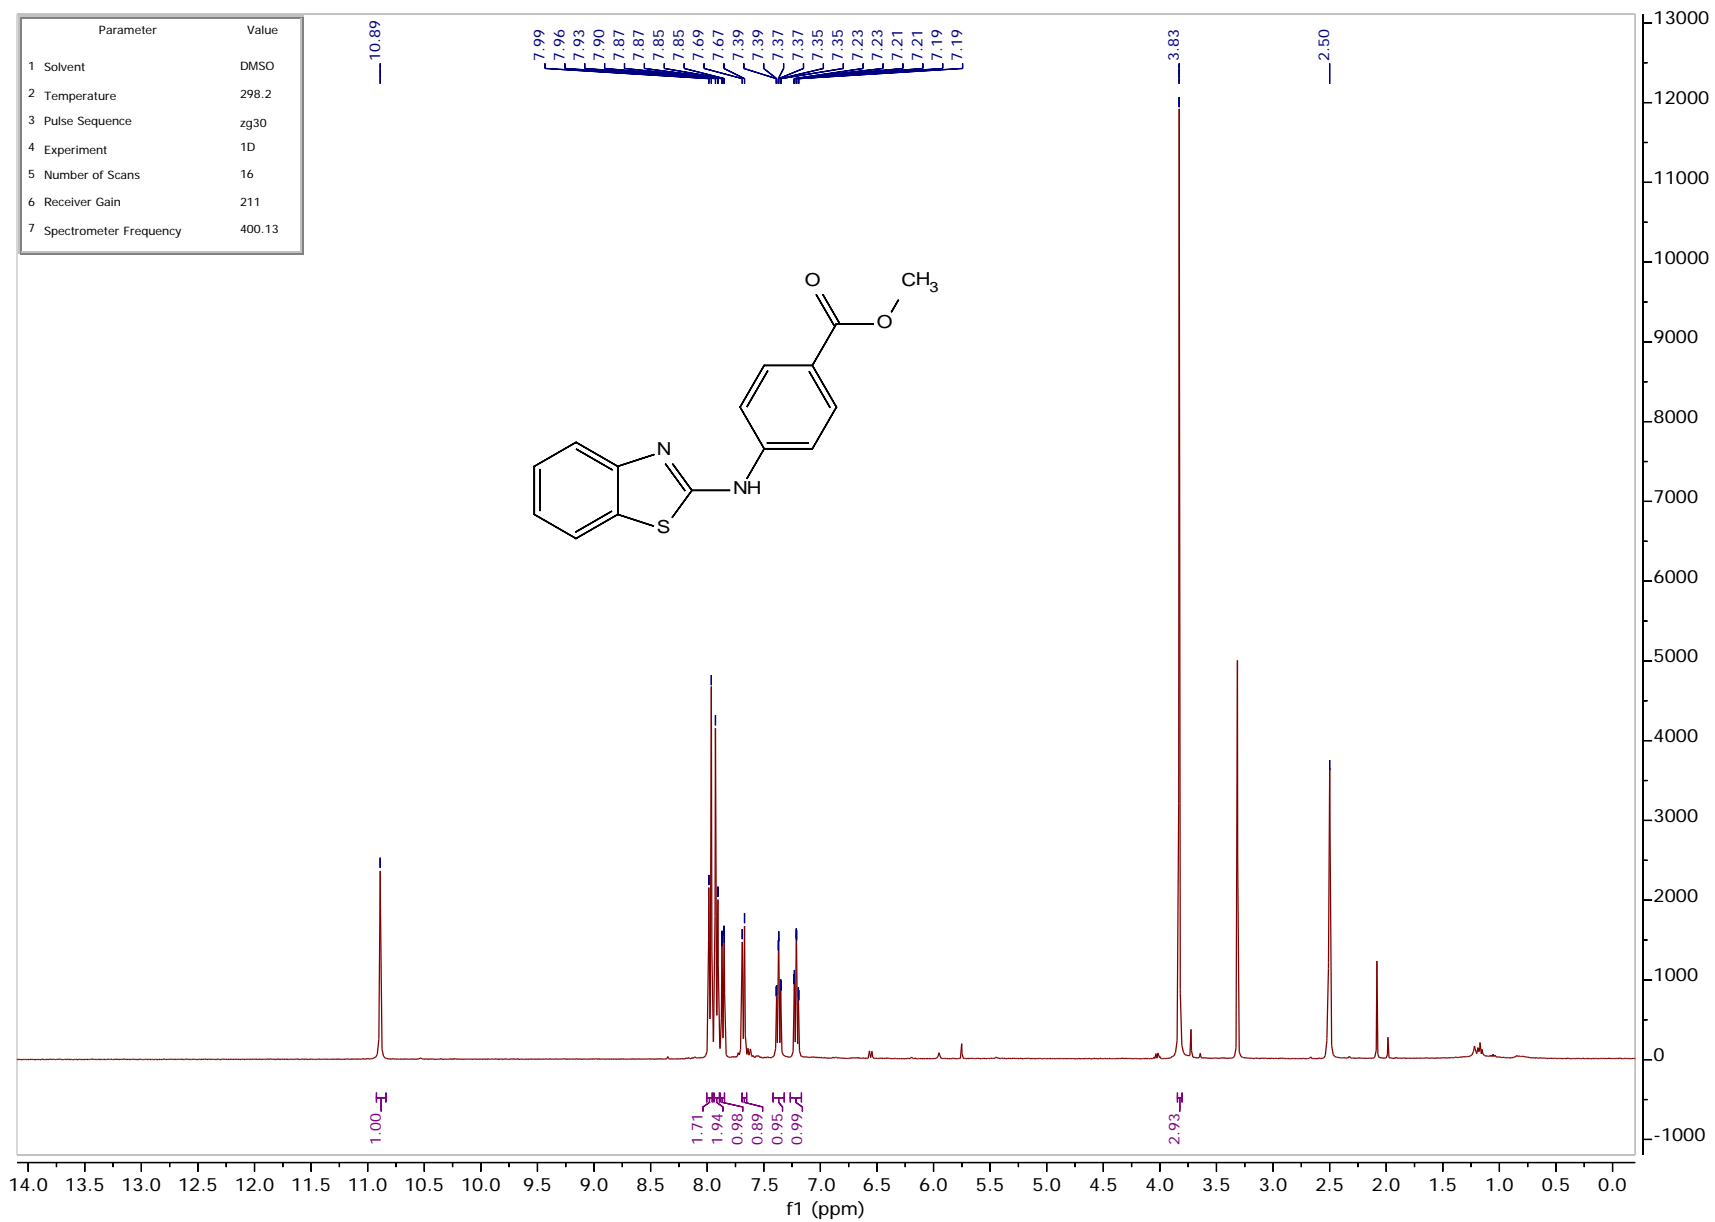

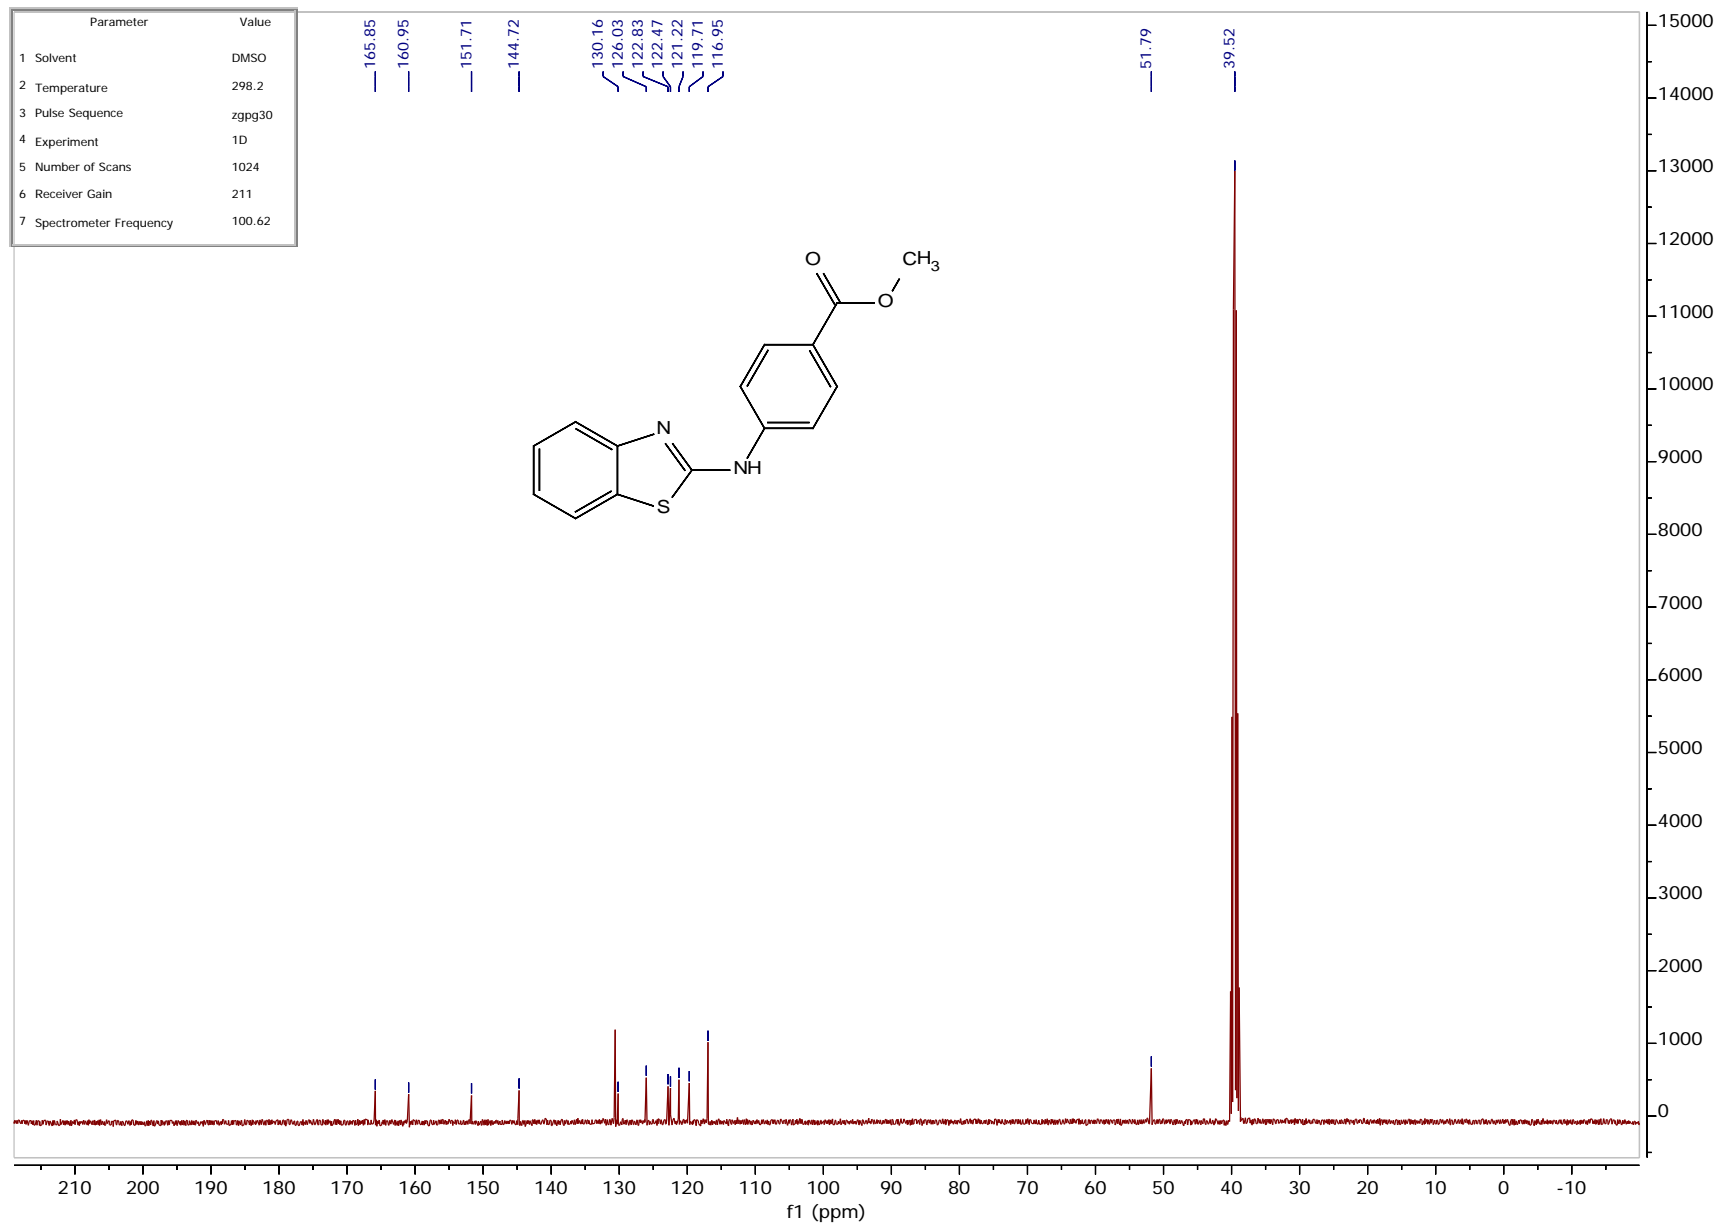

**1-{4-[(1.3-benzothiazol-2-yl)amino]phenyl}ethan-1-one (3k)**

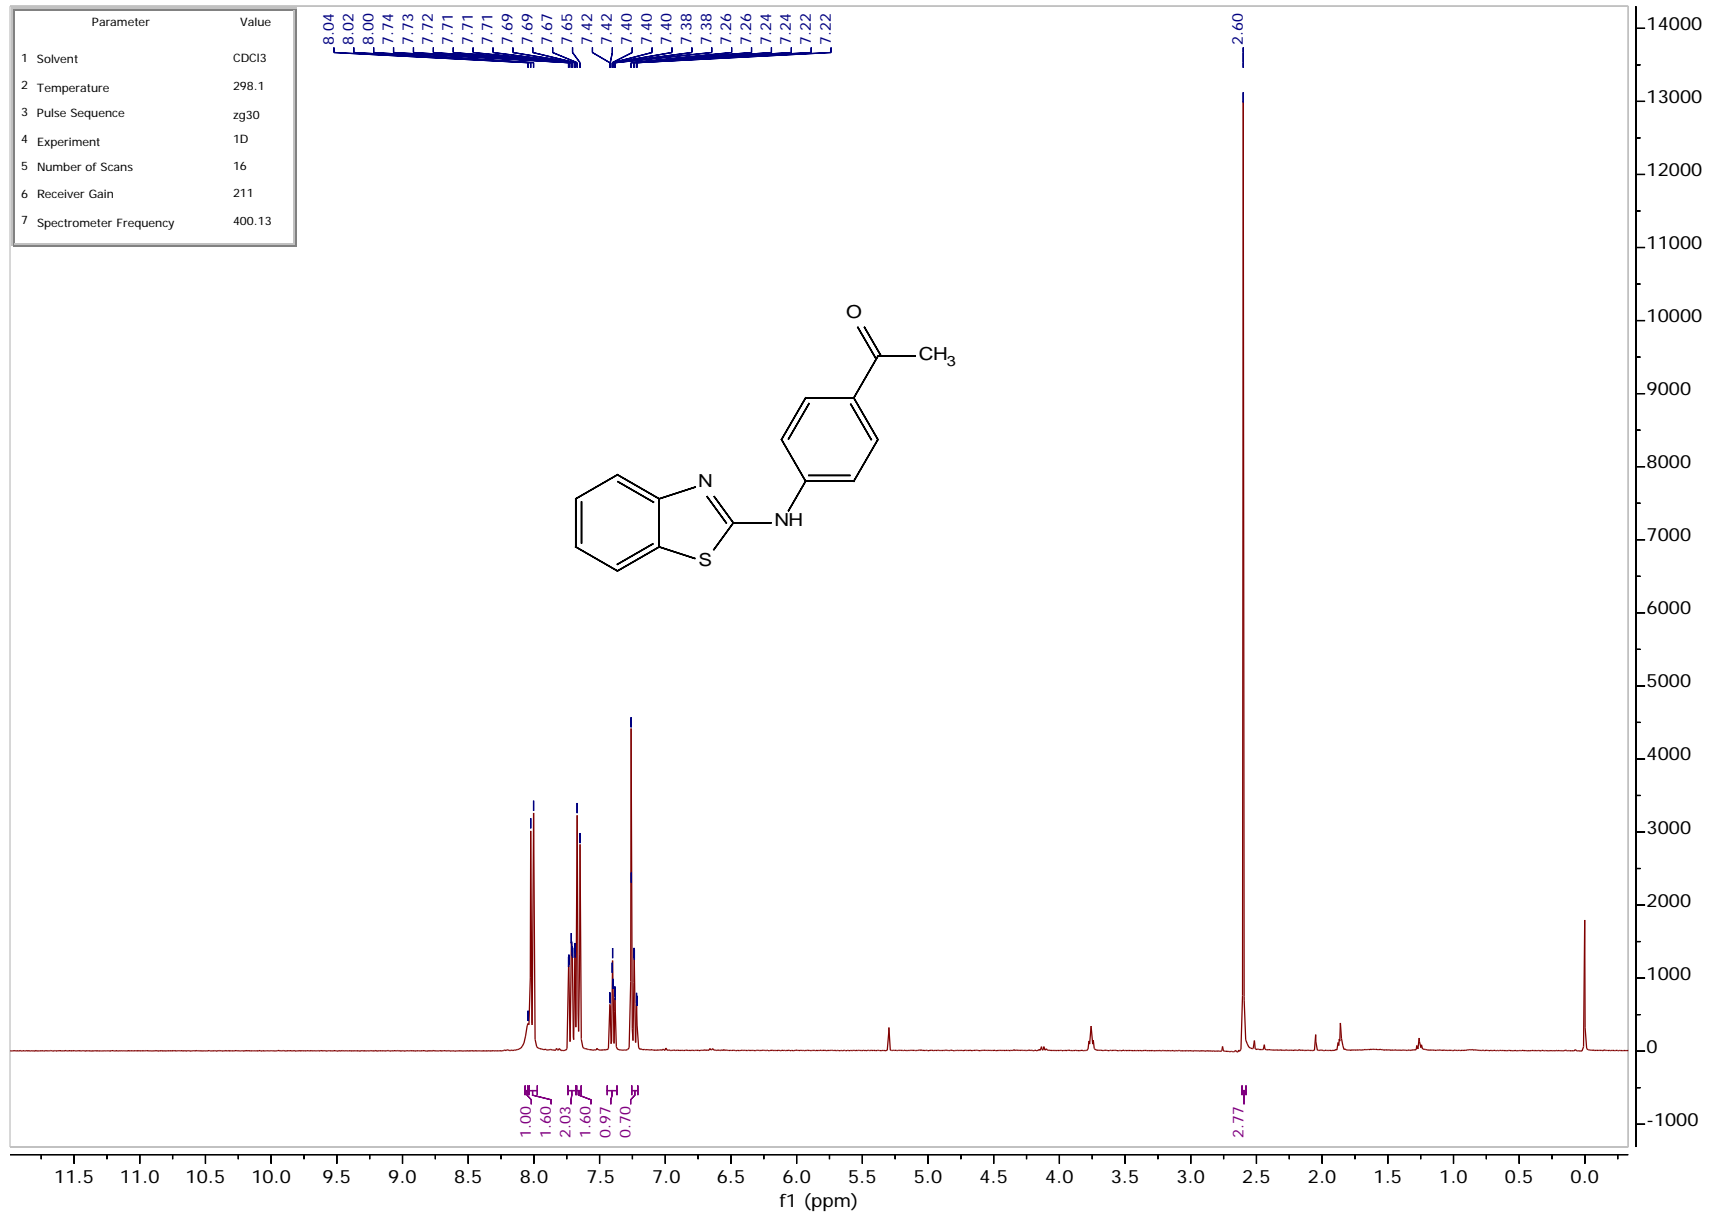

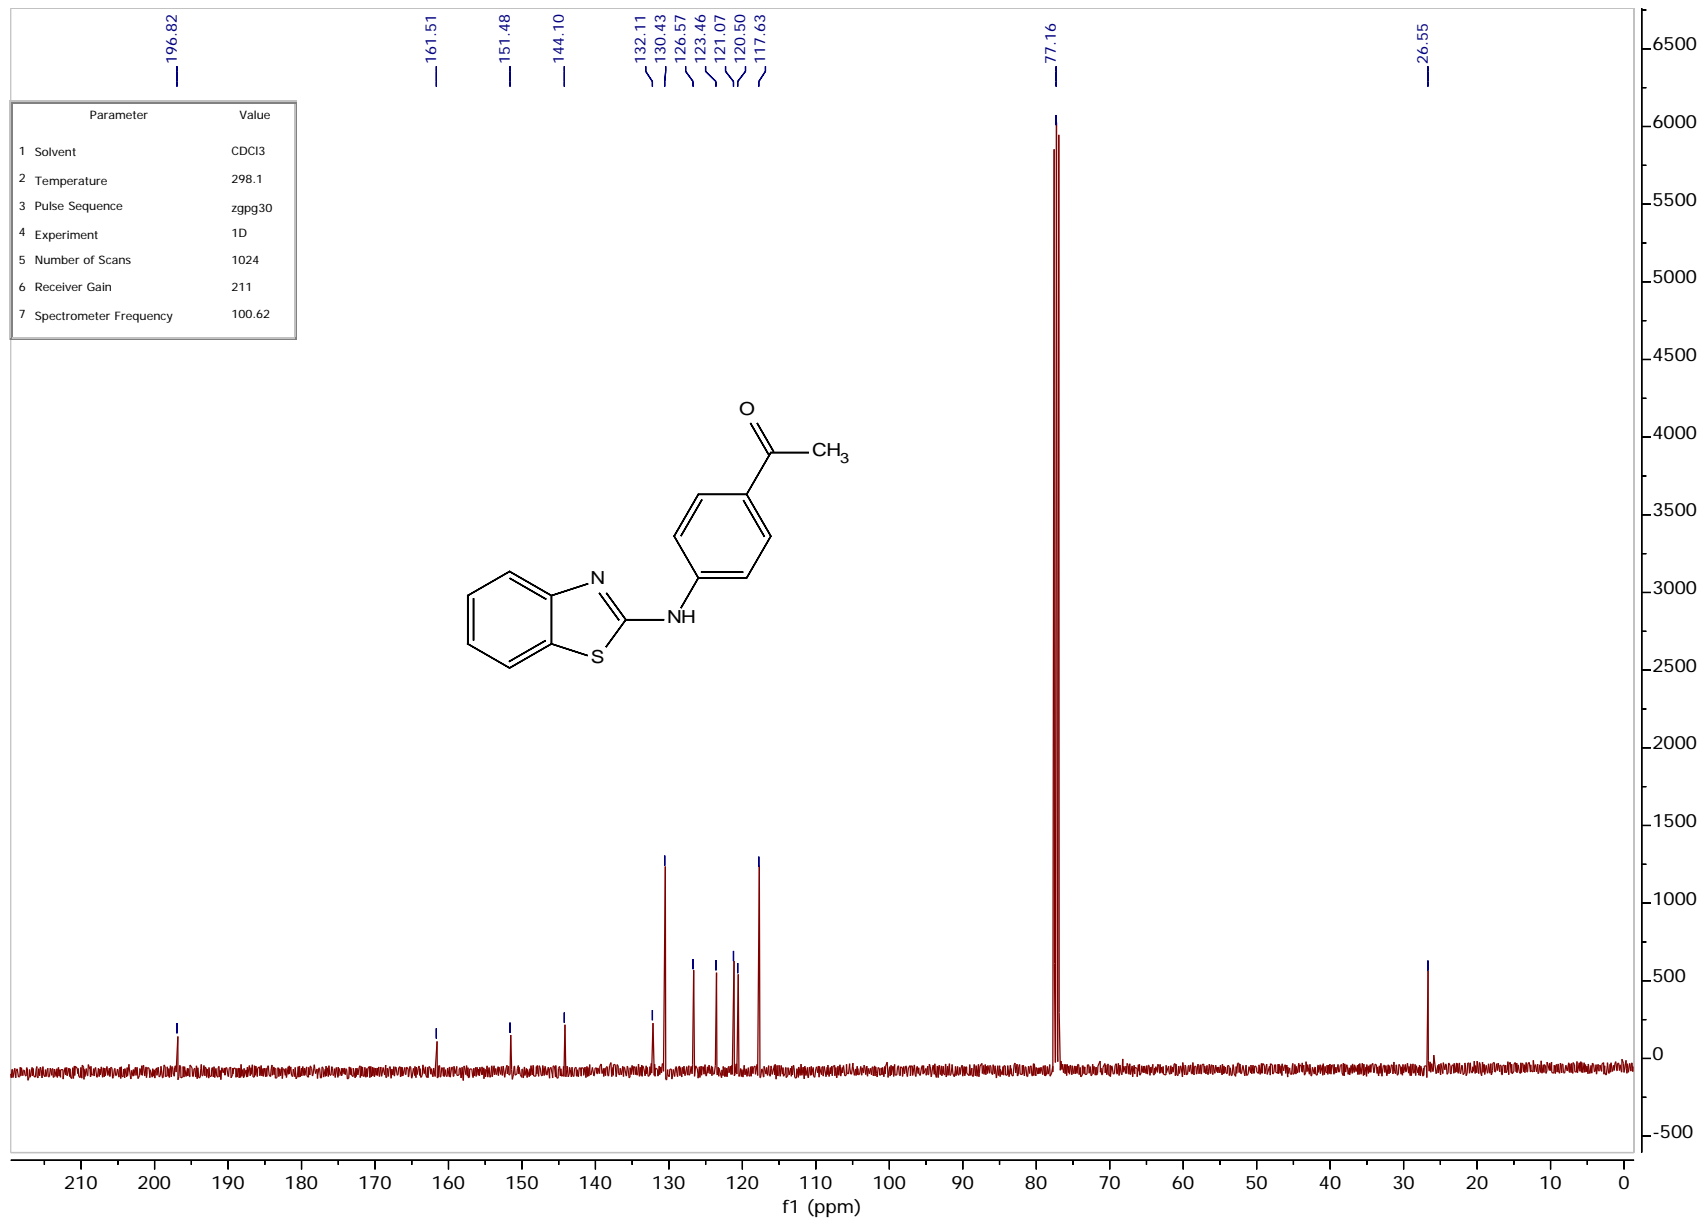

# *N*-(2-methylphenyl)-1,3-benzothiazol-2-amine (3l)

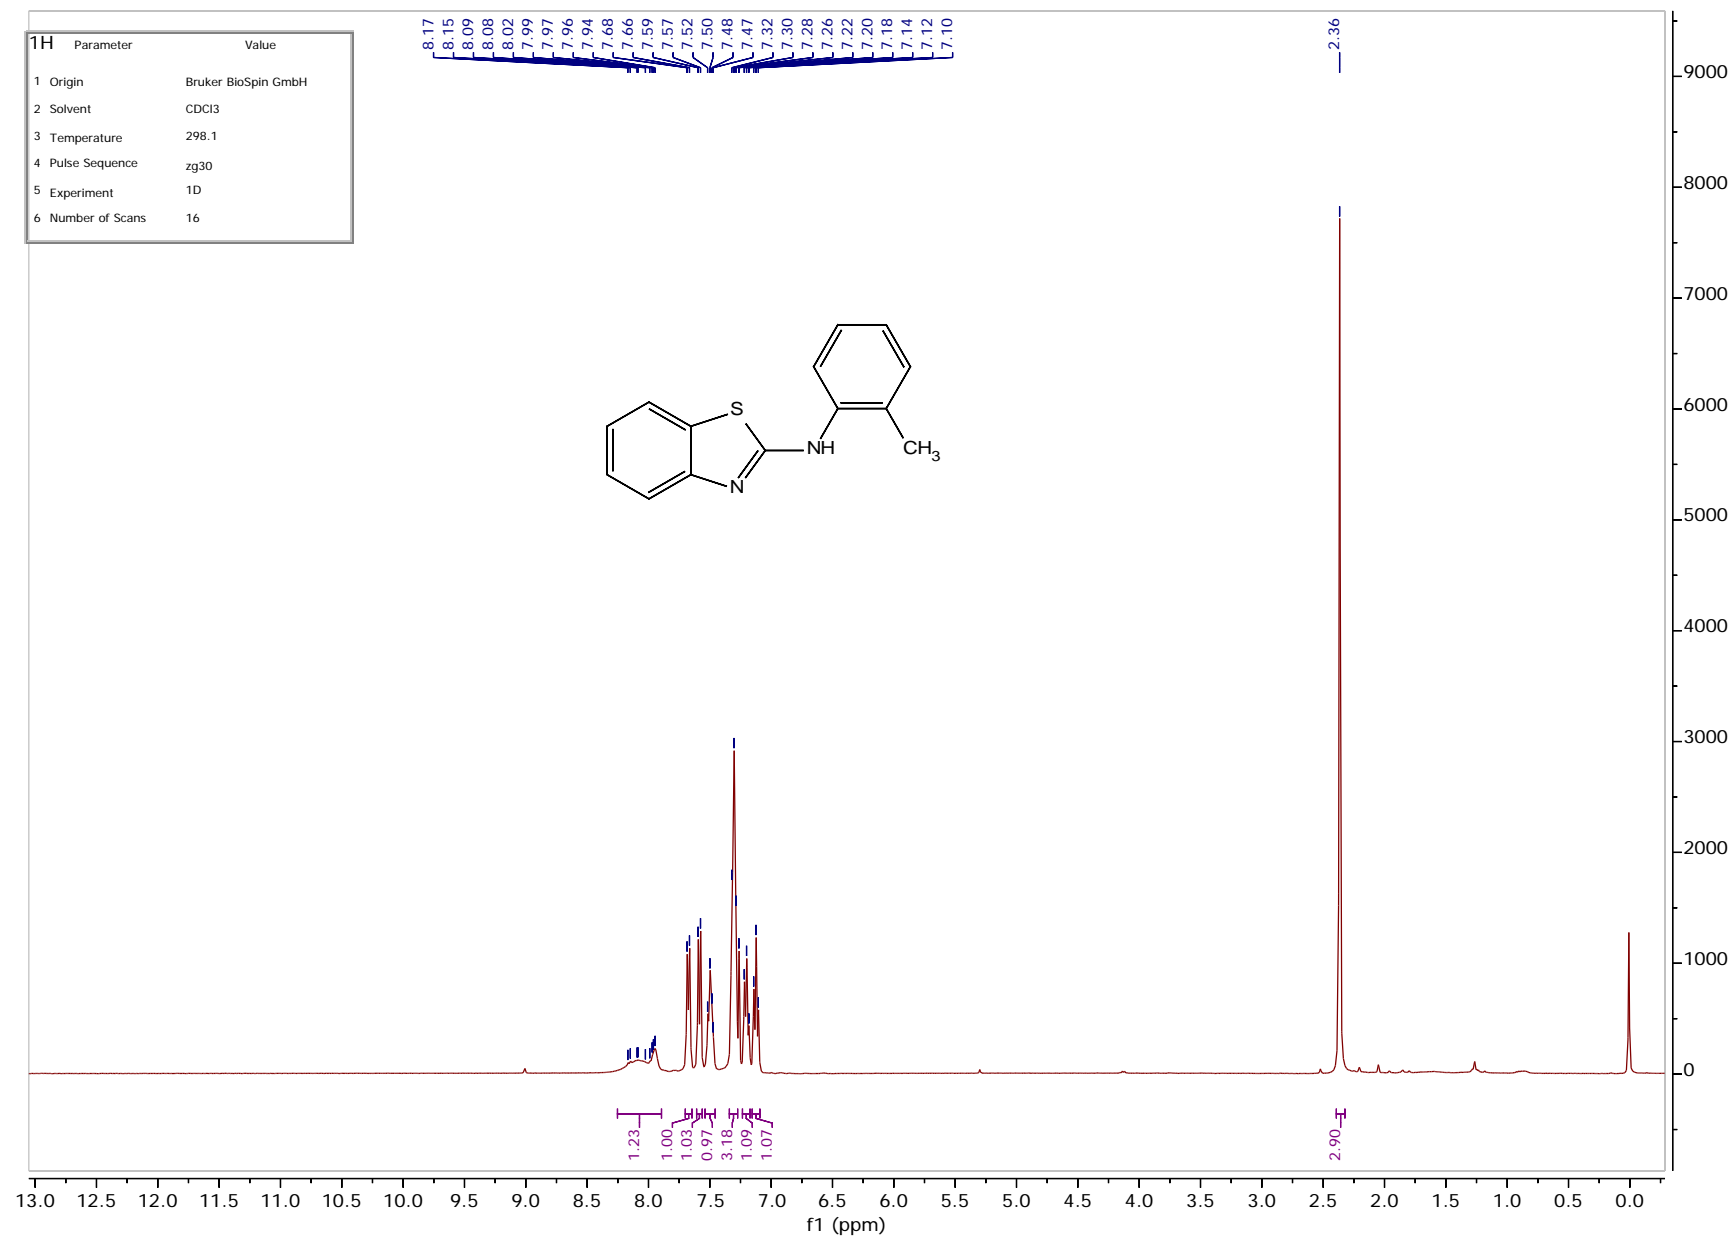



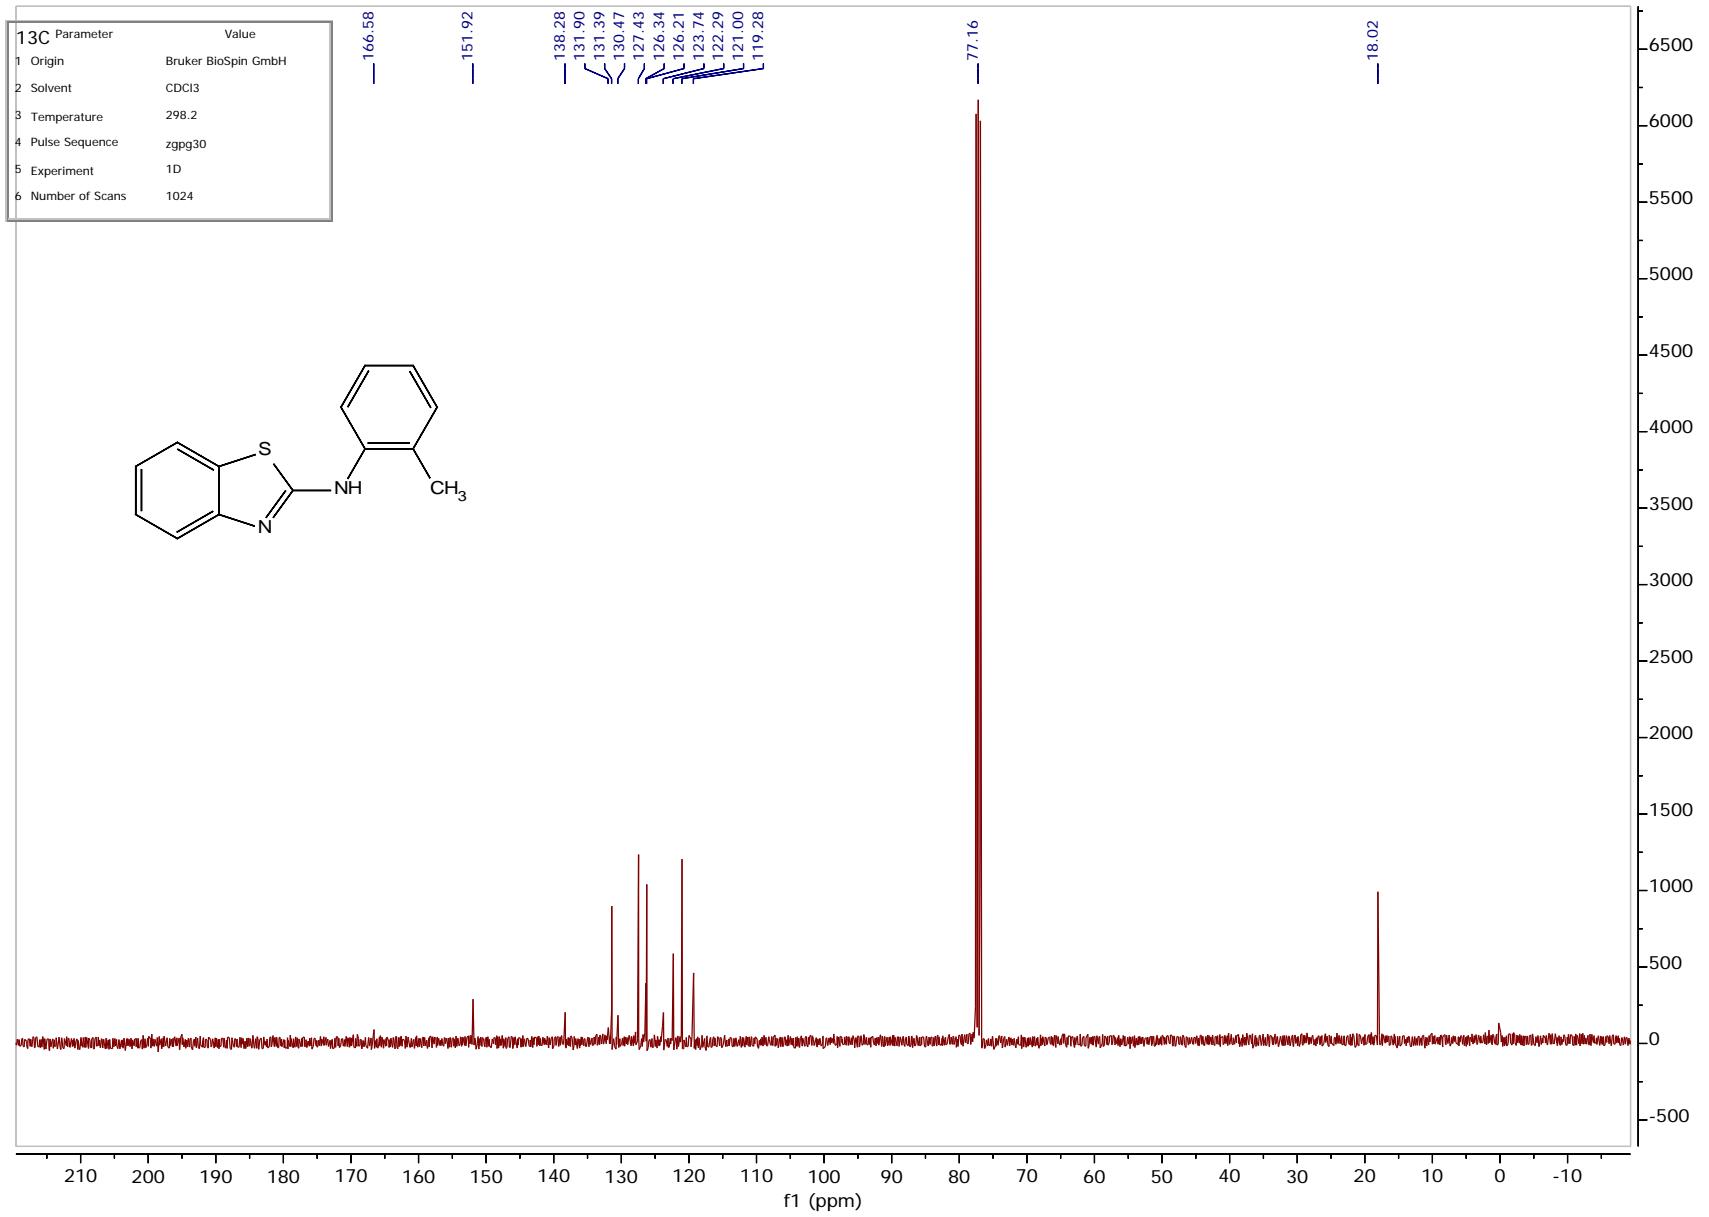

# *N*-(2-methyl-5-nitrophenyl)-1,3-benzothiazol-2-amine (3m)

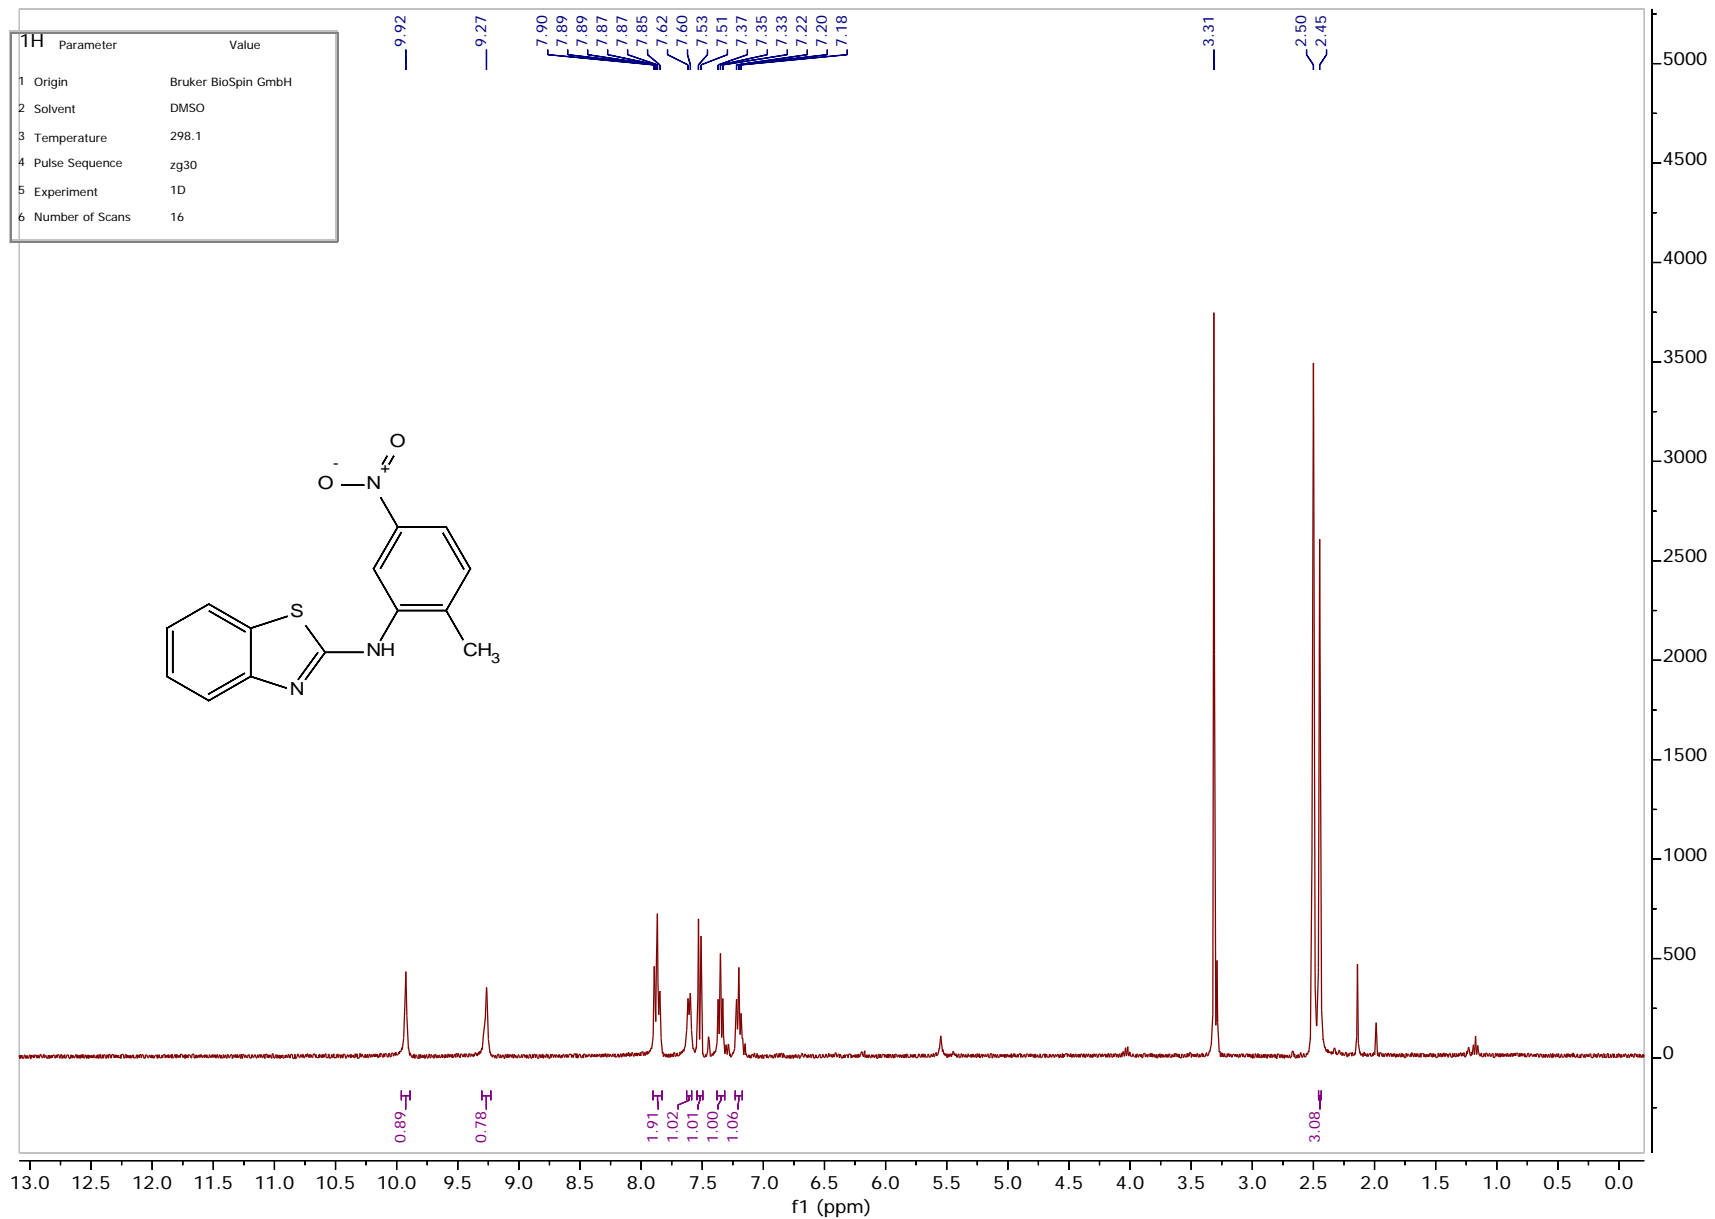

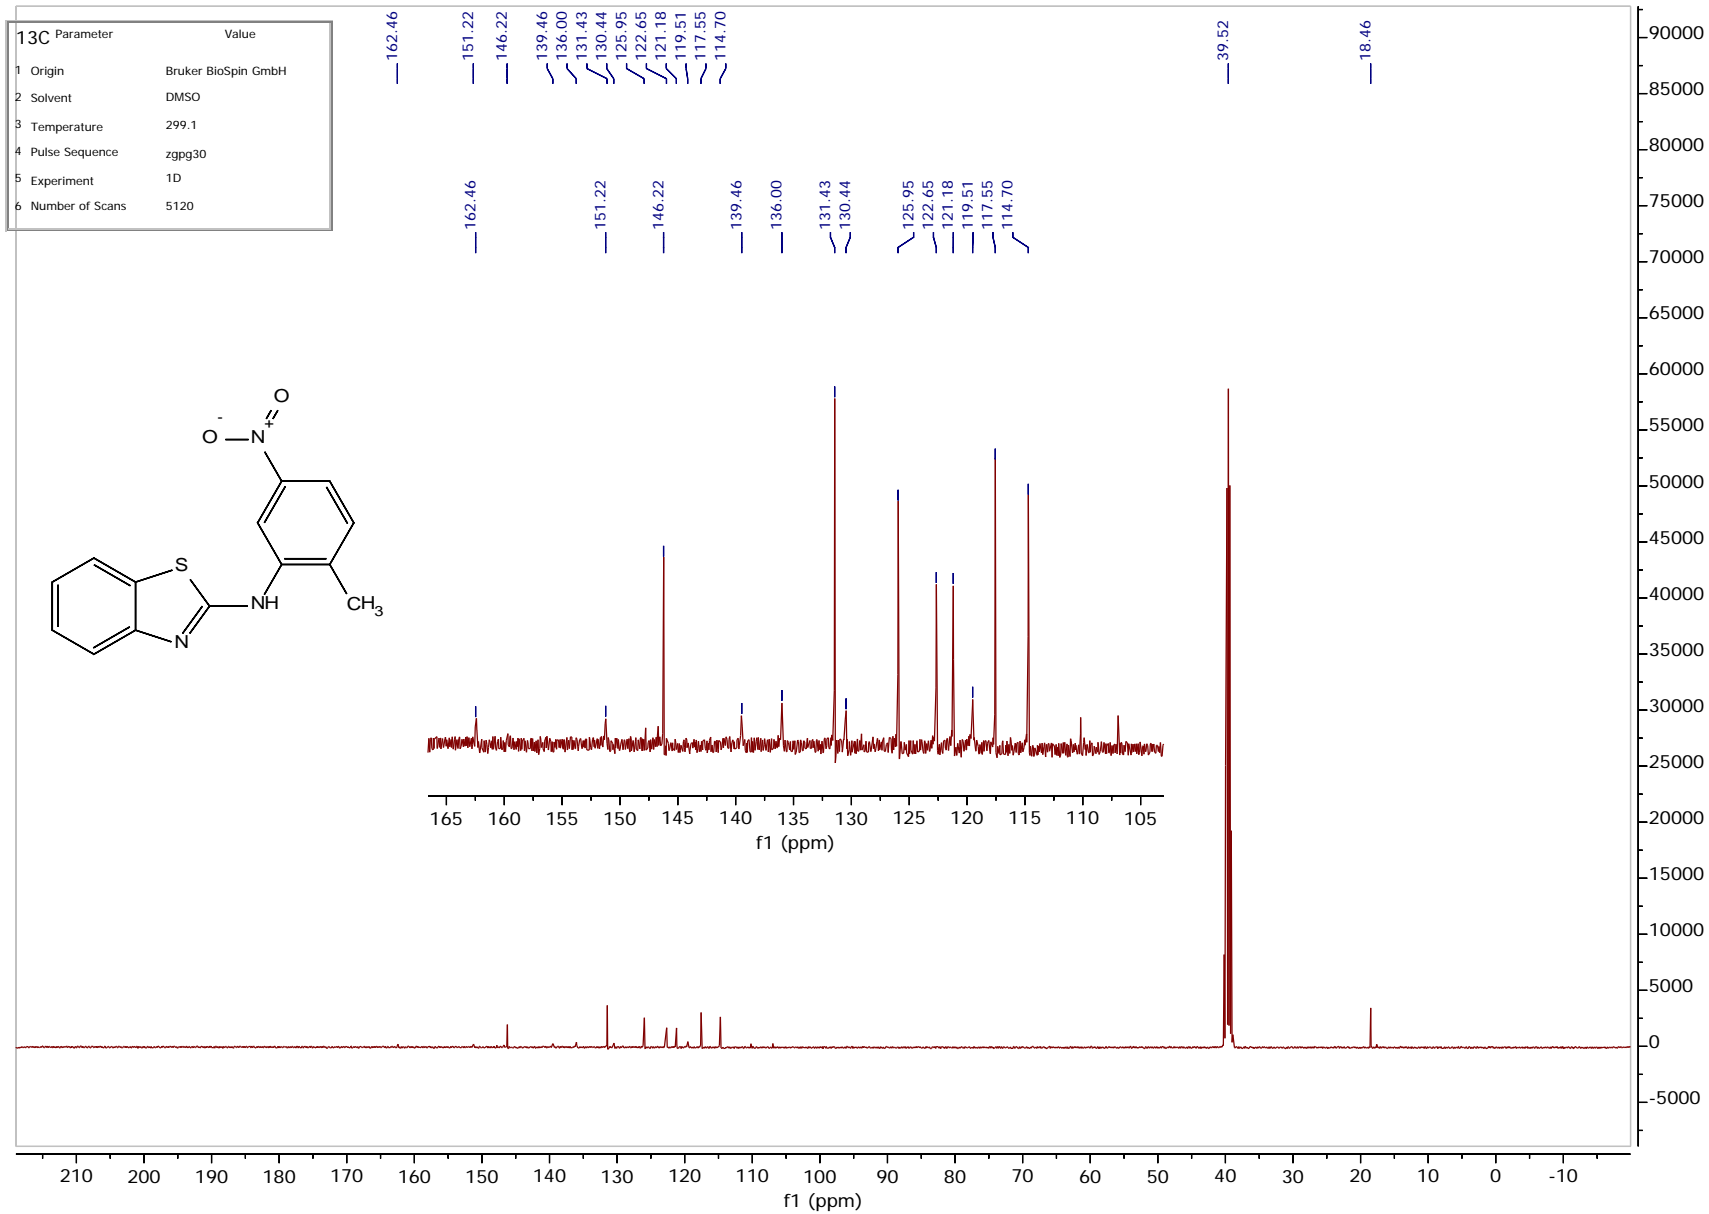

Supplement: c6ra15971k1.pdf [file c6ra15971k1.pdf]
